1  
2  
3  
4  
5  
6  
7  
8  
9  
10  
11  
12  
13  
14  
15  
16  
17  
18  
19  
20  
21  
22  
23  
24  
25  
26  
27  
28  
29  
30  
31  
32

## **Cytotoxic lymphocytes use mechanosurveillance to target biophysical vulnerabilities in cancer**

Maria Tello-Lafoz<sup>1</sup>, Katja Srpan<sup>2</sup>, Jing Hu<sup>3</sup>, Yevgeniy Romin<sup>4</sup>, Annalisa Calò<sup>4§</sup>, Katharine C. Hsu<sup>2</sup>, Joan Massagué<sup>3</sup>, Morgan Huse<sup>1†\*</sup>, and Ekrem Emrah Er<sup>3†#</sup>

<sup>1</sup> Immunology Program, Memorial Sloan Kettering Cancer Center, New York, NY, USA.

<sup>2</sup> Department of Medicine, Memorial Sloan Kettering Cancer Center, New York, NY, USA.

<sup>3</sup> Cancer Biology and Genetics Program, Memorial Sloan Kettering Cancer Center, New York, NY, USA.

<sup>4</sup> Molecular Cytology Core Facility, Memorial Sloan Kettering Cancer Center, New York, NY, USA.

<sup>§</sup> Current address: Department of Electronic and Biomedical Engineering, University of Barcelona, Spain.

<sup>#</sup> Current address: Department of Physiology and Biophysics, College of Medicine, University of Illinois Chicago, IL, USA.

<sup>†</sup> Corresponding authors. [husem@mskcc.org](mailto:husem@mskcc.org), [eer@uic.edu](mailto:eer@uic.edu)

<sup>\*</sup> Lead contact: [husem@mskcc.org](mailto:husem@mskcc.org)

33 **ABSTRACT**

34

35 **Immune cells identify cancer cells by recognizing characteristic biochemical**  
36 **features indicative of oncogenic transformation. Cancer cells have characteristic**  
37 **mechanical features, as well, but whether these biophysical properties also contribute to**  
38 **destruction by the immune system is not known. In the present study, we found that**  
39 **enhanced expression of myocardin related transcription factors (MRTFs), which promote**  
40 **migration and metastatic invasion, paradoxically compromised lung colonization by**  
41 **melanoma and breast carcinoma cells in an immune-mediated manner. Cancer cells with**  
42 **increased MRTF signaling were also more sensitive to immune checkpoint blockade**  
43 **therapy in mice and humans. The basis for this vulnerability was not biochemical, but**  
44 **biophysical. MRTF expression strengthened the actin cytoskeleton, increasing the**  
45 **rigidity of cancer cells and thereby making them more vulnerable to cytotoxic T**  
46 **lymphocytes and natural killer cells. These results reveal a mechanical dimension of**  
47 **immunosurveillance, which we call mechanosurveillance, that is particularly relevant to**  
48 **the targeting of metastatic disease.**

49

50

51

## 52 INTRODUCTION

53

54 Immune cells detect and eliminate cancer cells by recognizing characteristic features  
55 that are indicative of oncogenic transformation. This process, known as immunosurveillance, is  
56 critical for the destruction of incipient neoplastic growth and plays a central role in anti-cancer  
57 immunotherapy (Finn, 2018). It is generally thought that immunosurveillance is mediated by  
58 molecular cues, such as stress-ligands, neoantigens, and danger associated molecular  
59 patterns, that trigger activating receptors on patrolling immune cells (Hernandez et al., 2016;  
60 Schumacher et al., 2019; Vesely et al., 2011). These biochemical features, however, are not  
61 exhibited by all cancer cells at all stages of disease, and they can be found in untransformed  
62 tissue, as well. Hence, effective immunosurveillance must utilize additional determinants. In that  
63 regard, it is intriguing that cancer progression also involves profound changes in cellular  
64 architecture and mechanics (Hall, 2009; Northcott et al., 2018; Suresh, 2007). These  
65 biophysical events are critical for promoting migration and invasive capacity, but whether they  
66 also serve as a basis for immunosurveillance is not known.

67 Cytotoxic lymphocytes, comprising natural killer (NK) cells and cytotoxic T lymphocytes  
68 (CTLs), play a central role in anti-cancer immunosurveillance by engaging and destroying  
69 transformed cells (Finn, 2018). Their cytolytic activity is initially triggered by recognition of  
70 surface molecules characteristic of stress and transformation, including cognate peptide-major  
71 histocompatibility complex (MHC) and the UL16 binding proteins, which engage the T cell  
72 antigen receptor (TCR) and the activating NK receptor NKG2D, respectively (Lanier, 2005;  
73 Zhang and Bevan, 2011). The binding of these and other stimulatory ligands drives the  
74 formation of a stereotyped interface between the lymphocyte and its target, called the immune  
75 synapse (Dustin and Long, 2010) The lymphocyte then secretes toxic granzyme proteases and  
76 the pore forming protein perforin into the synaptic space, thereby inducing target cell apoptosis.

77 Immune synapses are physically active structures, exerting nanonewton scale  
78 mechanical forces that enhance the efficiency of perforin and granzyme-mediated killing  
79 (Bashour et al., 2014; Basu et al., 2016; Husson et al., 2011). These forces are also thought to  
80 facilitate lymphocyte activation by promoting mechanotransduction. Indeed, several activating  
81 immunoreceptors, including the TCR, only reach full signaling capacity under applied force  
82 (Friedland et al., 2009; Liu et al., 2014). This requirement places physical demands on the  
83 target cell surface, which must presumably be rigid enough to counterbalance the mechanical  
84 load placed upon receptor-bound ligands. Consistent with this idea, stiff surfaces bearing  
85 stimulatory ligands induce substantially stronger lymphocyte activation than softer surfaces

86 coated with the same proteins (Blumenthal et al., 2019; Comrie et al., 2015; Judokusumo et al.,  
87 2012; Saitakis et al., 2017; Wan et al., 2013). Hence, it is not unreasonable to expect that the  
88 biophysical properties of cancer cells might regulate their susceptibility to cytotoxic lymphocyte-  
89 mediated attack.

90 Cytotoxic lymphocytes are particularly effective at combatting metastatic cancer cells  
91 (Dye, 1986; Eyles et al., 2010; Malladi et al., 2016; Pommier et al., 2018; Wei et al., 2018),  
92 which live alone or in small groups far from the immunosuppressive microenvironment of the  
93 primary tumor. Interestingly, metastasis is associated with dramatic morphological and  
94 biophysical change, mostly driven by remodeling of the filamentous actin (F-actin) cytoskeleton.  
95 This supports multiple steps in the metastatic cascade, including local invasion from the primary  
96 tumor, intravasation into circulation, and subsequent extravasation into target organs (Bravo-  
97 Cordero et al., 2012). It is now becoming clear that F-actin dynamics are also critical for  
98 metastatic outgrowth in the new microenvironment, which typically occurs in the perivascular  
99 niche, a nutrient rich milieu on the abluminal surface of microvessels (Ghajar et al., 2013;  
100 Kienast et al., 2010). To expand successfully in this space, metastatic cells first establish strong  
101 adhesion to the microvascular basement membrane (Shibue and Weinberg, 2009; Valiente et  
102 al., 2014). This triggers a mechanotransduction response in which cell spreading and migration  
103 are coupled to the activation of myocardin-related transcription factors (MRTF) A and B (Er et  
104 al., 2018). In the steady state, MRTF isoforms are sequestered in the cytoplasm via binding to  
105 monomeric globular actin (G-actin). Cytoskeletal growth, often induced by Rho-family GTPases  
106 like RAC1, depletes this G-actin pool, liberating MRTFA and MRTFB to enter the nucleus (Gau  
107 and Roy, 2018; Gualdrini et al., 2016; Kim et al., 2017; Lionarons et al., 2019; Medjkane et al.,  
108 2009; Olson and Nordheim, 2010). Once localized in this manner, MRTFs form complexes with  
109 the DNA-binding protein serum response factor (SRF) to drive expression of more G-actin and  
110 cytoskeletal components. Morphoregulation by MRTF is absolutely required for metastatic  
111 invasion and subsequent proliferative expansion (Er et al., 2018). However, because analogous  
112 shape changes have been shown to increase cell stiffness (Kasza et al., 2009), it is tempting to  
113 speculate that MRTF signaling might also mechanically sensitize cancer cells to cytotoxic  
114 lymphocytes.

115 In the present study, we explored this hypothesis by analyzing the effects of MRTF on  
116 the mechanical properties of cancer cells, their immune sensitivity, and their capacity to colonize  
117 tissues *in vivo*. Our results reveal a novel, mechanical form of immunosurveillance that enables  
118 cytotoxic lymphocytes to target the specific biophysical features of metastatic cancer cells.

119  
120

## 121 RESULTS

122

### 123 MRTF overexpression sensitizes metastatic cells to the immune system

124 Given the importance of MRTF-mediated mechanotransduction for migration and  
125 metastasis, and the unique position of MRTF in F-actin regulation, we reasoned that  
126 manipulating MRTFA and MRTFB levels might reveal novel vulnerabilities associated with  
127 cancer cell architecture (Fig. 1A). To explore this idea, we employed an established model of  
128 metastatic colonization in which malignant cancer cells expressing luciferase are injected  
129 intravenously into congenic mice and their subsequent growth in the lung monitored by  
130 bioluminescent imaging (Fig. 1B). shRNA-mediated suppression of MRTFA and MRTFB  
131 reduced lung colonization by both B16F10 melanoma and E0771 breast cancer cells in this  
132 model (Fig. 1C-D and Fig. S1A), consistent with previous data showing that MRTF is required  
133 for metastatic seeding (Er et al., 2018; Kim et al., 2017; Medjkane et al., 2009). However,  
134 B16F10 and E0771 cell lines overexpressing MRTFB (B16F10-MRTFB and E0771-MRTFB)  
135 exhibited dramatically reduced lung colonization (Fig. 1E-F and Fig. S1A), the opposite of what  
136 one would expect for cells with enhanced MRTF-induced invasiveness. E0771-MRTFA cells  
137 also metastasized poorly, although B16F10-MRTFA cells displayed increased colonization (Fig.  
138 S2A).

139 We initially hypothesized that elevated MRTF signaling might impair metastasis by  
140 inhibiting cancer cell proliferation. Overexpression of MRTFA and MRTFB, however, did not  
141 significantly alter cancer cell growth and division *in vitro*, as assessed by the acquisition of vital  
142 dye and the dilution of tracing stain, respectively (Fig. S1B-C). Proliferation *in vivo*, which we  
143 quantified by staining tumor sections for the Ki67 marker, was similarly unchanged (Fig. S1D).  
144 We also examined the effects of MRTF overexpression on steady state cell death, and found  
145 that only E0771-MRTFA cells exhibited increased apoptosis in isolation (Fig. S1E). These  
146 results suggested that the reduced metastatic capacity conferred by MRTF was not entirely  
147 intrinsic to the tumor cells and instead required component(s) of the metastatic  
148 microenvironment.

149 Histological analyses of B16F10 and E0771 lung lesions revealed a substantial number  
150 of infiltrating CD8<sup>+</sup> CTLs and NK cells (Fig. 2A and Fig. S2B). To assess the importance of  
151 these lymphocytes for MRTF dependent cancer cell death, we depleted mice of NK cells and  
152 CTLs using anti-asialo GM1 and anti-CD8 antibodies, respectively, prior to injecting B16F10 or  
153 E0771 cells (Fig. 2B). NK cell depletion dramatically enhanced colonization by B16F10-MRTFA  
154 and B16F10-MRTFB cells (Fig. 2C and Fig. S2C). In the case of B16F10-MRTFB cells, this

155 effect led to a striking phenotypic reversal in which the overexpressing cells now exhibited  
156 stronger metastatic growth than B16F10 controls (compare Fig. 1E to 2C). Depletion of CD8<sup>+</sup> T  
157 cells induced similarly remarkable increases in both E0771-MRTFB and E0771-MRTFA  
158 colonization (Fig. 2D and Fig. S2D). Interestingly, NK depletion did not rescue the metastatic  
159 activity of E0771-MRTFB cells (Fig. S2E), implying that these cells were primarily constrained  
160 by CTLs *in vivo*, whereas B16F10-MRTFB tumors were subject to NK-mediated control.  
161 Collectively, these results demonstrate that the increased metastatic potential conferred by  
162 MRTF expression is curbed by cytotoxic lymphocytes (Fig. 2E).

163

### 164 **MRTF renders cancer cells more stimulatory to cytotoxic lymphocytes**

165 The importance of CTLs and NK cells for the MRTF dependent suppression of  
166 metastasis *in vivo* suggested that MRTF signaling might make cancer cells more vulnerable to  
167 cellular cytotoxicity. To investigate this hypothesis, we loaded B16F10 and E0771 cells  
168 containing different levels of MRTF with ovalbumin<sub>257-264</sub> peptide (OVA) and then mixed them  
169 with CTLs expressing the OT1 TCR, which recognizes OVA bound to the MHC protein H2Kb.  
170 shRNA-induced suppression of MRTFA and MRTFB reduced B16F10 killing in these  
171 experiments, while overexpression of either MRTF isoform enhanced CTL-mediated lysis (Fig.  
172 3A-B). E0771-MRTFA and E0771-MRTFB cells were also more sensitive to CTLs than E0771  
173 controls (Fig. 3C). This effect was specific for cellular cytotoxicity, as overexpression of MRTFA  
174 and MRTFB did not, in general, boost apoptotic responses to staurosporine and tumor necrosis  
175 factor (TNF), although E0771-MRTFA cells were more vulnerable to these agents (Fig. S3A-B).

176 To investigate how MRTF signaling sensitizes cancer cells to cellular cytotoxicity, we  
177 exposed B16F10 and E0771 cell lines to purified perforin and granzyme B. Neither MRTF  
178 isoform increased cell death in these experiments (Fig. S3C), indicating that the intrinsic cellular  
179 response to perforin and granzyme was unchanged. Cytotoxic lymphocytes also produce Fas  
180 ligand (FasL), which induces apoptosis in target cells expressing the death receptor Fas  
181 (Nagata, 1999). Although E0771-MRTFA cells expressed elevated levels of Fas and underwent  
182 apoptosis in response to soluble FasL, E0771-MRTFB, B16F10-MRTFA, and B16F10-MRTFB  
183 cells expressed little to no Fas and were resistant to FasL-mediated killing (Fig. S3D-E). Hence,  
184 differential sensitivity to perforin/granzyme or FasL did not broadly explain how MRTF signaling  
185 makes cancer cells more vulnerable to cytotoxic attack.

186 Next, we examined whether cancer cells overexpressing MRTFA and MRTFB induce  
187 stronger lymphocyte activation. Perforin and granzymes are stored in specialized secretory  
188 lysosomes called lytic granules, which fuse with the plasma membrane after synapse formation

189 (Stinchcombe and Griffiths, 2007). To quantify granule exocytosis, which is also called  
190 degranulation, we monitored surface exposure of the lysosomal marker Lamp1 in OT1 CTLs  
191 cocultured with antigen-loaded cancer cells (Fig. 3D). Antigen-loaded B16F10-MRTFA/B and  
192 E0771-MRTFA/B cells induced stronger degranulation responses than did their respective  
193 controls (Fig. 3E), implying that increased MRTF signaling in the target cell enables more  
194 effective CTL stimulation. Activated CTLs also generate and release the inflammatory cytokines  
195 interferon- $\gamma$  (IFN $\gamma$ ) and TNF. Production of both of these cytokines was markedly enhanced in  
196 cocultures with MRTF overexpressing cancer cells (Fig. 3D, F-G). Collectively, these data  
197 indicated that MRTFA and MRTFB render cancer cells more stimulatory to cytotoxic  
198 lymphocytes.

199 To explore the generality of this paradigm, we extended our studies to splenic NK cells  
200 derived from C57BL/6 mice. Similar to our results with CTLs, we found that B16F10-MRTFA  
201 and B16F10-MRTFB cells induced significantly stronger NK cell degranulation than B16F10  
202 controls (Fig. 3H-I). We also examined primary human NK cells, which recognize and destroy  
203 the breast carcinoma cells lines MDA-MB-231 and MCF7. Peripheral blood mononuclear cells  
204 (PBMCs, ~10% CD56<sup>+</sup>CD3<sup>-</sup> NK cells) from multiple donors were mixed with parent MDA-MB-  
205 231 and MCF7 cells as well as lines overexpressing MRTFA and MRTFB. Degranulation  
206 responses were significantly stronger in cocultures with MRTF overexpressing cells (Fig. 3H, J),  
207 further supporting the interpretation that MRTF signaling boosts the stimulatory capacity of  
208 target cells. We conclude that MRTFA and MRTFB influence cytotoxic immune cell-cell  
209 interactions across both species and lymphocyte cell type.

210

### 211 **MRTF signaling enhances responsiveness to checkpoint blockade therapy**

212 The capacity of MRTF signaling to enhance CTL responses against cancer cells implied  
213 that it might increase the efficacy of immune checkpoint blockade (ICB), a group of antibody-  
214 based immunotherapies that function by derepressing tumor specific T cells (Lesokhin et al.,  
215 2015; Wei et al., 2018). To investigate this possibility, we injected mice with control B16F10 or  
216 B16F10-MRTFB cells and then administered three doses of blocking antibody against CTLA4, a  
217 well-established inhibitory checkpoint receptor (Fig. 4A). Although anti-CTLA4 treatment  
218 moderately reduced lung colonization by control B16F10 cells, this effect failed to confer a  
219 survival benefit (Fig. 4B-C). By contrast, blocking CTLA4 significantly inhibited B16F10-MRTFB  
220 metastasis, leading to a marked increase in survival. These results indicate that MRTF signaling  
221 sensitizes cancer cells *in vivo* to a therapeutically enhanced immune system.

222 To further explore this hypothesis in the context of human ICB trials, we examined  
223 clinical data for links between MRTF signaling and responsiveness to anti-CTLA4 therapy.  
224 While there are no reported MRTF gain-of-function mutations in human solid tumors, MRTF  
225 signaling is strongly induced by the constitutively active P29S mutant form of the small GTPase  
226 RAC1 (Fig. 4D) (Lionarons et al., 2019). RAC1<sup>P29S</sup> and related mutations (e.g. RAC1<sup>P29L</sup>) are  
227 found in ~5 % of human melanomas, a particularly aggressive subset that exhibits resistance to  
228 BRAF inhibitors in the clinic (Lionarons et al., 2019; Van Allen et al., 2014; Watson et al., 2014).  
229 Using the TCGA database, we were able to corroborate a link between these mutations and the  
230 MRTF-SRF pathway in human melanoma. Gene Set Enrichment Analysis (GSEA) revealed that  
231 RAC1/2<sup>P29S/L</sup> tumors significantly upregulated genes containing SRF binding sites (Fig. 4E and  
232 Fig. S4A-B), including *CNN2* (calponin 2), *VCL* (vinculin), and *FLNA* (filamin A) (Fig. 4F). Based  
233 on our *in vivo* mouse experiments, we reasoned that these tumors might also be more sensitive  
234 to ICB. Analysis of TCGA data revealed that patients with RAC1/2<sup>P29S/L</sup> melanoma exhibited  
235 reduced overall survival (Fig. 4G and Fig. S4B, Supplementary Table 1). In patients receiving  
236 anti-CTLA4 therapy, however, RAC1/2<sup>P29S/L</sup> mutations correlated with significantly improved  
237 outcomes (Fig. 4H and Fig. S4D, Supplementary Table 2). Taken together, these results are  
238 consistent with the idea that MRTF signaling becomes a liability for tumor cells during anti-  
239 CTLA4 ICB by augmenting therapeutic T cell responses (Fig. 4I).

240 The RAC1<sup>P29S</sup> mutation has been associated with UV damage (Cancer Genome Atlas,  
241 2015), raising the possibility that the pro-survival effect we observed in the context of anti-  
242 CTLA4 (Fig. 4H) did not result specifically from MRTF signaling but rather from T cell  
243 recognition of UV-induced neoantigens. To explore this alternative hypothesis, we examined  
244 whether melanoma patients with UV-damage associated driver mutations other than  
245 RAC1/2<sup>P29S/L</sup> also responded better to anti-CTLA4 therapy. UV-induced mutations in *PPP6C*,  
246 *IDH1*, and *FBXW7* did not correlate with increased survival, and while patients with *NF1*  
247 truncation did exhibit modestly improved responses, this effect was not statistically significant  
248 and, furthermore, it was primarily attributable to patients with co-occurring RAC1<sup>P29S/L</sup> mutations  
249 (Fig. S4C-E). We also investigated the expression of MRTF-SRF signature genes, and found  
250 that melanomas with UV-induced *NF1*, *PPP6C*, *IDH1*, and *FBXW7* mutations failed to  
251 upregulate this gene set (Fig. S4D). We conclude that MRTF-SRF-induced gene expression,  
252 rather than UV damage alone, promotes increased responsiveness to anti-CTLA4 in  
253 RAC1/2<sup>P29S/L</sup> melanoma.

254

255 **MRTF sensitizes cancer cells to cytotoxic lymphocytes by increasing stiffness**



256 To investigate how MRTFA and MRTFB render cancer cells more stimulatory to  
257 cytotoxic lymphocytes, we performed whole transcriptome RNA-sequencing of B16F10 and  
258 E0771 cells overexpressing each transcription factor. MRTFA induced hundreds of expression  
259 changes in both cells lines, the majority of which were gene upregulation events (Fig. 5A-C).  
260 Some of the most strongly activated genes were actin isoforms and cytoskeletal regulators,  
261 among them *Acta1*, *Actg2*, *Fhl1*, and *Myh11*. Although MRTFB generated more modest  
262 expression changes, nevertheless it induced many of the same cytoskeletal genes (Fig. 5A-C),  
263 implying that it was these genes that were responsible for the shared effects of MRTFA and  
264 MRTFB on immune sensitization. To further explore this idea, we performed Gene Ontology  
265 analysis using gene sets induced by one MRTF isoform in both cells lines and also gene sets  
266 induced by both MRTF isoforms in each cell line (Fig. 5B Fig. S5). The results did not reveal  
267 substantial MRTF-induced expression of immune related pathways. Processes and components  
268 pertaining to the actin cytoskeleton and cellular architecture were dramatically induced,  
269 however, in line with the known functions of MRTF signaling (Gau and Roy, 2018; Olson and  
270 Nordheim, 2010) (Fig. 5B and Fig. S5). Consistent with these results, B16F10 and E0771 cells  
271 overexpressing MRTFA and MRTFB contained copious amounts of filamentous actin (F-actin),  
272 which in some cases formed dense arrays of stress fibers (Fig. 5D).

273 These striking architectural phenotypes raised the possibility that MRTF signaling might  
274 modulate immune activation by altering the biophysical properties of cancer cells. Given that the  
275 stiffness of the opposing surface controls activating mechanotransduction through the immune  
276 synapse (Blumenthal et al., 2019; Comrie et al., 2015; Judokusumo et al., 2012; Saitakis et al.,  
277 2017; Wan et al., 2013), and knowing the importance of the actin cytoskeleton for cellular  
278 architecture, we hypothesized that MRTF signaling might render cancer cells more stimulatory  
279 by increasing their rigidity (Fig. 6A). To investigate this hypothesis, we used atomic force  
280 microscopy (AFM)-based indentation to profile the effects of MRTFA and MRTFB on the  
281 deformability of B16F10, E0771, MDA-MB-231, and MCF7 cells (Fig. 6B). Overexpression of  
282 either MRTFA or MRTFB significantly increased the average and peak stiffness of every cell line  
283 examined (Fig. 6C-F). Stiffness measurements decreased dramatically in the presence of the  
284 F-actin depolymerizing agent latrunculin A (Fig. 6G), confirming the importance of the actin  
285 cytoskeleton for controlling this parameter (Rotsch and Radmacher, 2000). These results  
286 establish strong correlations between the biophysical effects of MRTF overexpression and the  
287 capacity of cancer cells to activate cytotoxic lymphocytes.

288 Although the data above are consistent with a biophysical mechanism of MRTF-induced  
289 immune vulnerability, they do not rule out the possibility that enhanced MRTF signaling might

290 sensitize cancer cells to cytotoxic lymphocytes by changing the surface expression of a critical  
291 immunoreceptor ligand. To investigate this alternative explanation, we focused first on class I  
292 MHC and ligands for NKG2D. We were particularly interested in NKG2D because it was  
293 downregulated by human NK cells cocultured with MDA-MB-231 or MCF7 targets (Fig. S6A),  
294 implying the presence of cognate ligands on the target surface. MRTF overexpression had little  
295 to no effect on NKG2D ligands in both mouse (B16F10 and E0771) and human (MDA-MB-231  
296 and MCF7) cell lines, and although MHC was upregulated in E0771-MRTFA cells, we did not  
297 observe increased MHC expression in B16F10-MRTFA cells or in any of the cell lines  
298 overexpressing MRTFB (Fig. S6B-C). Hence, changes in MHC or NKG2D ligands did not  
299 explain how MRTFA and MRTFB rendered cancer cells more stimulatory to cytotoxic  
300 lymphocytes.

301 To further investigate whether MRTF-mediated immune vulnerability was indeed caused  
302 by cytoskeletally induced biophysical changes and not the expression of undefined cell surface  
303 molecule(s), we analyzed the stimulatory capacity of giant plasma membrane  
304 vesicles (GPMVs) derived from cancer cells of interest (Fig. 7A) (Schneider et al., 2017; Sezgin  
305 et al., 2012). We reasoned that GPMVs would contain all of the molecular machinery present on  
306 the cell surface, but not the cytoskeleton, enabling us to delineate the effects of the former from  
307 the latter. Using the live F-actin probe LifeAct-GFP, we found that GPMVs did indeed lack a  
308 cortical F-actin cytoskeleton (Fig. S7A), in line with previous work (Schneider et al., 2017).  
309 Compared with whole cell extracts, GPMVs contained more of the cell surface proteins H2Kb  
310 and ATP1A1, less of the nuclear protein histone-H3, and none of the Golgi marker GM130 (Fig.  
311 S7B), consistent with a plasma membrane origin. GPMVs derived from antigen-loaded B16F10  
312 cells stimulated CTL calcium flux and cytokine production (Fig. 6B-C), indicating that they  
313 contained the surface ligands required for T cell activation. Importantly, whereas B16F10-  
314 MRTFA and B16F10-MRTFB cells induced stronger CTL activation than control B16F10 cells  
315 (Fig. 3 and Fig. 7C), GPMVs derived from MRTF overexpressing cells were not more  
316 stimulatory than the GPMVs derived from controls (Fig. 7C), implying that the F-actin  
317 cytoskeleton is required for MRTF-induced immune activation. Using IFN $\gamma$ , which drives MHC  
318 upregulation (Fig. S6B), we were able to enhance the stimulatory capacity of both B16F10 cells  
319 and the GPMVs they generated. This treatment did not, however, alter the consequences of  
320 MRTF signaling, which continued to affect only the stimulatory capacity of intact cells, but not of  
321 GPMVs (Fig. 7C). We conclude that enhanced lymphocyte stimulation by MRTF overexpressing  
322 cells is not caused by differential expression cell surface molecules, but rather by increased  
323 cytoskeletal stiffness beneath the plasma membrane.

324

## 325 DISCUSSION

326

327 Characteristic genetic and biochemical traits enable cancer cells to grow in an  
328 unregulated manner, but they also create vulnerabilities, such as oncogene addiction, metabolic  
329 reliance, and sensitivity to genotoxic agents, that can be targeted by appropriate therapeutic  
330 modalities (Behan et al., 2019; Bryant et al., 2005; DeBerardinis and Chandel, 2016; Farmer et  
331 al., 2005; Weinstein, 2002). Our present study extends this paradigm into the biophysical  
332 domain by demonstrating that the architectural and mechanical properties that enable  
333 metastatic growth also serve as an Achilles heel for destruction by cytotoxic lymphocytes.  
334 Isolated cancer cells are typically less rigid than untransformed cells from the same parent  
335 tissue (Guck et al., 2005; Hou et al., 2009; Xu et al., 2012). To occupy the metastatic niche,  
336 however, cancer cells must spread on the microvascular basement membrane (Er et al., 2018;  
337 Valiente et al., 2014), thereby increasing their rigidity to the point where they trigger robust  
338 lymphocyte activation. This coupling of colonization with biophysical vulnerability provides an  
339 explanation for why metastasis is so inefficient, and it also identifies mechanosensing of cancer  
340 cell rigidity as a novel mode of immunosurveillance.

341 In principle, mechanical immunosurveillance, or mechanosurveillance, would enable the  
342 immune system to target cellular dysfunction that does not detectably alter the biochemical  
343 recognition of cell surface proteins or secreted factors. In practice, however, it seems more  
344 likely that both biochemical and biophysical features will control immune vulnerability in a  
345 combinatorial manner. For instance, our observation that MRTF-induced suppression of E0771  
346 cells requires CD8<sup>+</sup> CTLs, while the anti-B16F10 response is dominated by NK cells, probably  
347 reflects the fact that E0771 cells express higher levels of class I MHC, which would activate T  
348 cells and inhibit NK cells. Hence, the cell biological contexts within which mechanosurveillance  
349 operates will be dictated by specific molecular interactions between cytotoxic lymphocytes and  
350 the target cells in question. Deciphering this crosstalk will be a fascinating area of future study.

351 It is generally thought that increasing target rigidity amplifies lymphocyte activation via  
352 mechanosensitive cell surface receptors (Huse, 2017; Zhu et al., 2019). Certain  
353 immunoreceptors, including the TCR, integrins, and the NK receptor CD16, are known to form  
354 catch bonds, in which the lifetime of interactions with cognate ligand increases under applied  
355 force (Gonzalez et al., 2019; Kong et al., 2009; Liu et al., 2014). There are also indications that  
356 synaptic forces induce conformational changes in the TCR, integrins, and components of  
357 integrin-mediated adhesions that are required for optimal signal transduction (del Rio et al.,  
358 2009; Friedland et al., 2009; Lee et al., 2015). Actin dependent stiffening of the target cell could

359 facilitate all of these processes by restraining deformation orthogonal to the cell surface.  
360 Enhanced cortical F-actin accumulation could also restrict the lateral mobility of cell surface  
361 ligands in the plasma membrane by strengthening adhesion between the membrane and the  
362 cytoskeleton or by altering the confinement properties of membrane corrals (Gauthier et al.,  
363 2012; Jacobson et al., 2019). Reduced lateral mobility is a particularly interesting possibility in  
364 light of work indicating that dendritic cells potentiate integrin activation on T cells by restraining  
365 the diffusion of an integrin ligand on their own surface (Comrie et al., 2015).

366 Although cortical F-actin is a predominant regulator of cellular mechanics, other  
367 molecular components influence the biophysical properties of cells and could therefore  
368 contribute to mechanosurveillance. Ezrin-radixin-moesin (ERM) proteins and lipid modifying  
369 enzymes modulate cellular architecture and migration by controlling interactions between the  
370 plasma membrane and the F-actin cortex (Balla, 2013; Clucas and Valderrama, 2014). Both  
371 classes of protein have been implicated in cancer progression and therefore represent intriguing  
372 candidate regulators. Oncogenic transformation is also associated with dysregulation of the  
373 microtubule cytoskeleton (Parker et al., 2014), which could result in structural abnormalities that  
374 are detectable by immune cells. A role for microtubules in mechanosurveillance is particularly  
375 intriguing because they are targeted by a number of chemotherapeutic agents, such as Taxol,  
376 raising the possibility that these treatment modalities might modulate anti-tumor immune  
377 responses biophysically.

378 The immune sensitization mechanism characterized in this study resulted from a cell  
379 intrinsic mechanical trait (cellular stiffness). That being said, tumor progression is associated  
380 with cell extrinsic biophysical changes, as well, such as increased ECM adhesiveness and  
381 rigidity (stromal stiffness) (Kai et al., 2019; Levental et al., 2009), which could also be coupled to  
382 immune vulnerabilities. ECM remodeling is generally thought to promote malignancy by  
383 stimulating cancer cell migration, epithelial to mesenchymal transition (EMT), and transcriptional  
384 programs important for tumorigenesis (Kai et al., 2019). ECM stiffness, in particular, has been  
385 shown to drive cancer cell proliferation via the transcription factor YAP (Yes-associated protein)  
386 (Albregues et al., 2018; Panciera et al., 2020). These same changes in the ECM, however,  
387 could also promote anti-tumor immunity in certain contexts. Indeed, matrix-induced metastatic  
388 outgrowth drives MRTF signaling (Er et al., 2018), which we now know triggers lymphocyte  
389 mechanosurveillance. Further study of how the ECM and other aspects of tumor architecture  
390 and mechanics affect both the movement and the functional potential of infiltrating immune cells  
391 could identify additional therapeutic opportunities.

392 The idea that metastatic cells must fine-tune MRTF signaling to balance the benefits of  
393 cell spreading with the drawbacks of immune activation conceptually parallels recent work on  
394 the regulation of EMT during cancer progression (Alderton, 2013; Ocana et al., 2012; Tsai et al.,  
395 2012). Although EMT promotes migration, invasion, multipotency, and resistance to certain  
396 therapies (Zhang and Weinberg, 2018), it has also been shown to hinder proliferation and  
397 promote apoptosis (David et al., 2016; Kong et al., 2017). Hence, to metastasize effectively,  
398 cancer cells must employ transcriptional programs of both EMT and mesenchymal to epithelial  
399 transition, balancing the proliferative and invasive properties of each cellular state. The  
400 importance of fine tuning EMT in this way is highlighted by the observation of partial EMT  
401 signatures in patients with metastatic disease (Puram et al., 2018). Interestingly, the loss of  
402 some, but not all, epithelial characteristics during partial EMT is thought to be important for the  
403 acquisition of stem cell-like properties and metastatic dormancy, a state of prolonged  
404 quiescence in which cancer cells evade the immune system (Lawson et al., 2015; Malladi et al.,  
405 2016; Pommier et al., 2018). Dormancy ends when metastatic colonies engage the ECM,  
406 thereby activating YAP and MRTF to drive outgrowth (Albregues et al., 2018; Er et al., 2018;  
407 Shibue and Weinberg, 2009). Determining how these various cellular states affect not only the  
408 biochemical but also the biophysical properties of cancer cells will provide for a better  
409 understanding of how metastatic tumors balance partial EMT, stem cell-like behavior, and  
410 awakening from metastatic dormancy in order to grow in the face of immunosurveillance.

411 The RAC1<sup>P29S/L</sup> allele is generally associated with enhanced melanoma malignancy and  
412 resistance to targeted therapies (Lionarons et al., 2019; Van Allen et al., 2014; Watson et al.,  
413 2014), including the BRAF inhibitor vemurafenib. Our results, however, indicate that this  
414 mutation actually increases tumor responsiveness to ICB, implying that RAC1<sup>P29S/L</sup> may be  
415 useful as a positive predictive indicator for this class of treatments. Although RAC1 activates  
416 multiple downstream signaling pathways, MRTF has been shown to be critical for the specific  
417 effects of RAC1<sup>P29S</sup> on melanoma physiology (Lionarons et al., 2019), and our mechanistic  
418 results *in vitro* and in mouse models support a role for MRTF in triggering anti-tumor immunity,  
419 specifically via mechanosurveillance. Critically, we have also documented an MRTF-SRF gene  
420 signature in human RAC1/2<sup>P29S/L</sup> melanoma, providing direct evidence that MRTF signaling  
421 enhances ICB-induced immunosurveillance of human tumors. It will be interesting to see if the  
422 MRTF-SRF signature itself correlates with responsiveness to ICB, independent of RAC1  
423 mutation, as this would enable identification of additional patients likely to benefit from this  
424 therapy.

425           A number of intracellular pathogens, including HIV, Chlamydia, and Listeria, dramatically  
426 remodel the host cell cytoskeleton to enable intracellular motility, proliferation, and the infection  
427 of neighboring cells (Bhavsar et al., 2007; Metais et al., 2018; Wesolowski and Paumet, 2017).  
428 The capacity of these architectural changes to modulate the immune response, both positively  
429 and negatively, has not been examined. It has been shown, however, that CD4<sup>+</sup> T cells latently  
430 infected with HIV contain high levels of viral integration in the *Mrtfa* and *Mrtfb* loci, implying that  
431 disruption of the MRTF pathway enables infected cells to elude the immune system (Maldarelli  
432 et al., 2014). Furthermore, the HIV virulence factor Nef, which disrupts cytoskeletal polarity, was  
433 recently found to enhance the survival of infected cells in an immunocompetent mouse model  
434 (Usmani et al., 2019). Therefore, defining the genetic and molecular bases of  
435 mechanosurveillance will likely illuminate cellular immunity against not only cancer but also  
436 infectious disease.

437

438

439

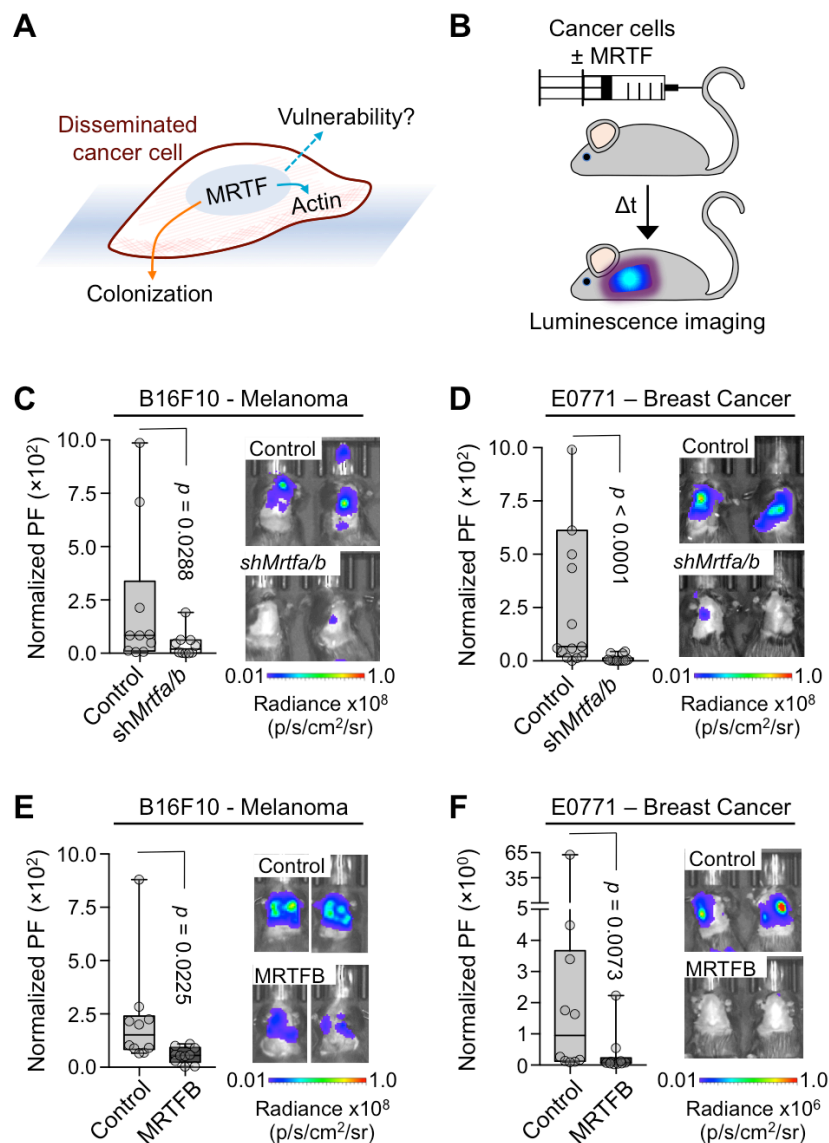

440  
 441 **Fig. 1. MRTF overexpression inhibits lung metastasis.**  
 442 (A) MRTF signaling promotes metastatic colonization but may also create vulnerabilities. (B)  
 443 Experimental design for lung colonization model. (C-D) Metastatic burden in lungs of C57BL/6J  
 444 mice injected with syngeneic control or *Mrtfa/b* knockdown B16F10 (C) or E0771 (D) cells,  
 445 measured by bioluminescent imaging (BLI) 3 weeks after tail vein injection and normalized to  
 446 the first day of injection. PF: photon flux ( $n = 10$  mice per group). (E-F) BLI of mice 3 weeks post  
 447 tail vein injection with B16F10 (E) or E0771 (F) cells overexpressing MRTFB or empty vector  
 448 control ( $n = 10$  mice per group). Box plots show upper and lower quartiles, median, maximum,  
 449 and minimum values.  $p$  values were calculated by Mann-Whitney test. See also Fig. S1 and S2.  
 450

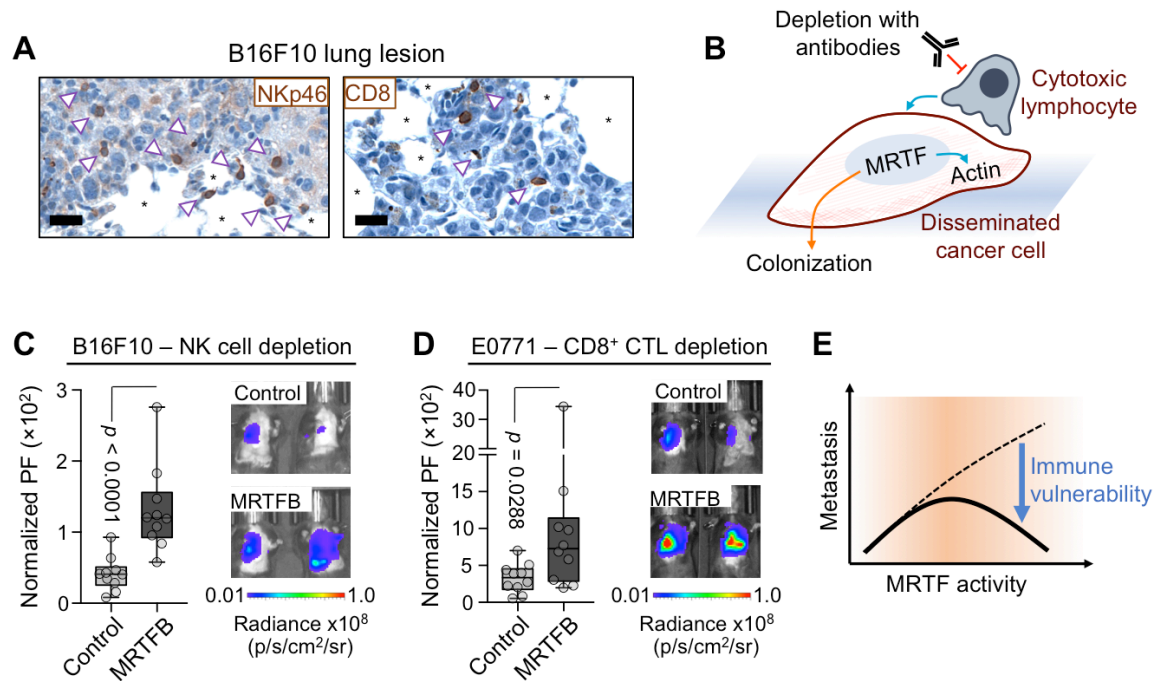

451

452 **Fig. 2. MRTF sensitizes cells to cytotoxic lymphocytes.**

453 (A) Representative IHC images of NK cell (arrowheads, NKp46 staining) and CD8<sup>+</sup> T cell  
454 (arrowheads, CD8 staining) infiltration in B16F10 lung metastases. \*: alveolar space, scale bars:  
455 20  $\mu$ m. (B) Using blocking antibodies to inhibit immunosurveillance by cytotoxic lymphocytes.  
456 (C-D) BLI of mice pretreated with anti-asialo GM1 antibody (C) or anti-CD8 antibody (D) for NK  
457 and CD8<sup>+</sup> T cell depletion, respectively, and imaged 2 weeks after injection of the indicated  
458 cancer cells ( $n = 10$  mice per group). (E) Model showing correlation between increased MRTF  
459 activity and metastatic potential (dashed line). These properties are uncoupled because high  
460 MRTF expression sensitizes metastatic cells to cytotoxic lymphocytes (solid line). Box plots  
461 show upper and lower quartiles, median, maximum, and minimum values.  $p$  values were  
462 calculated by Mann-Whitney test. See also Fig. S1 and S2.

463



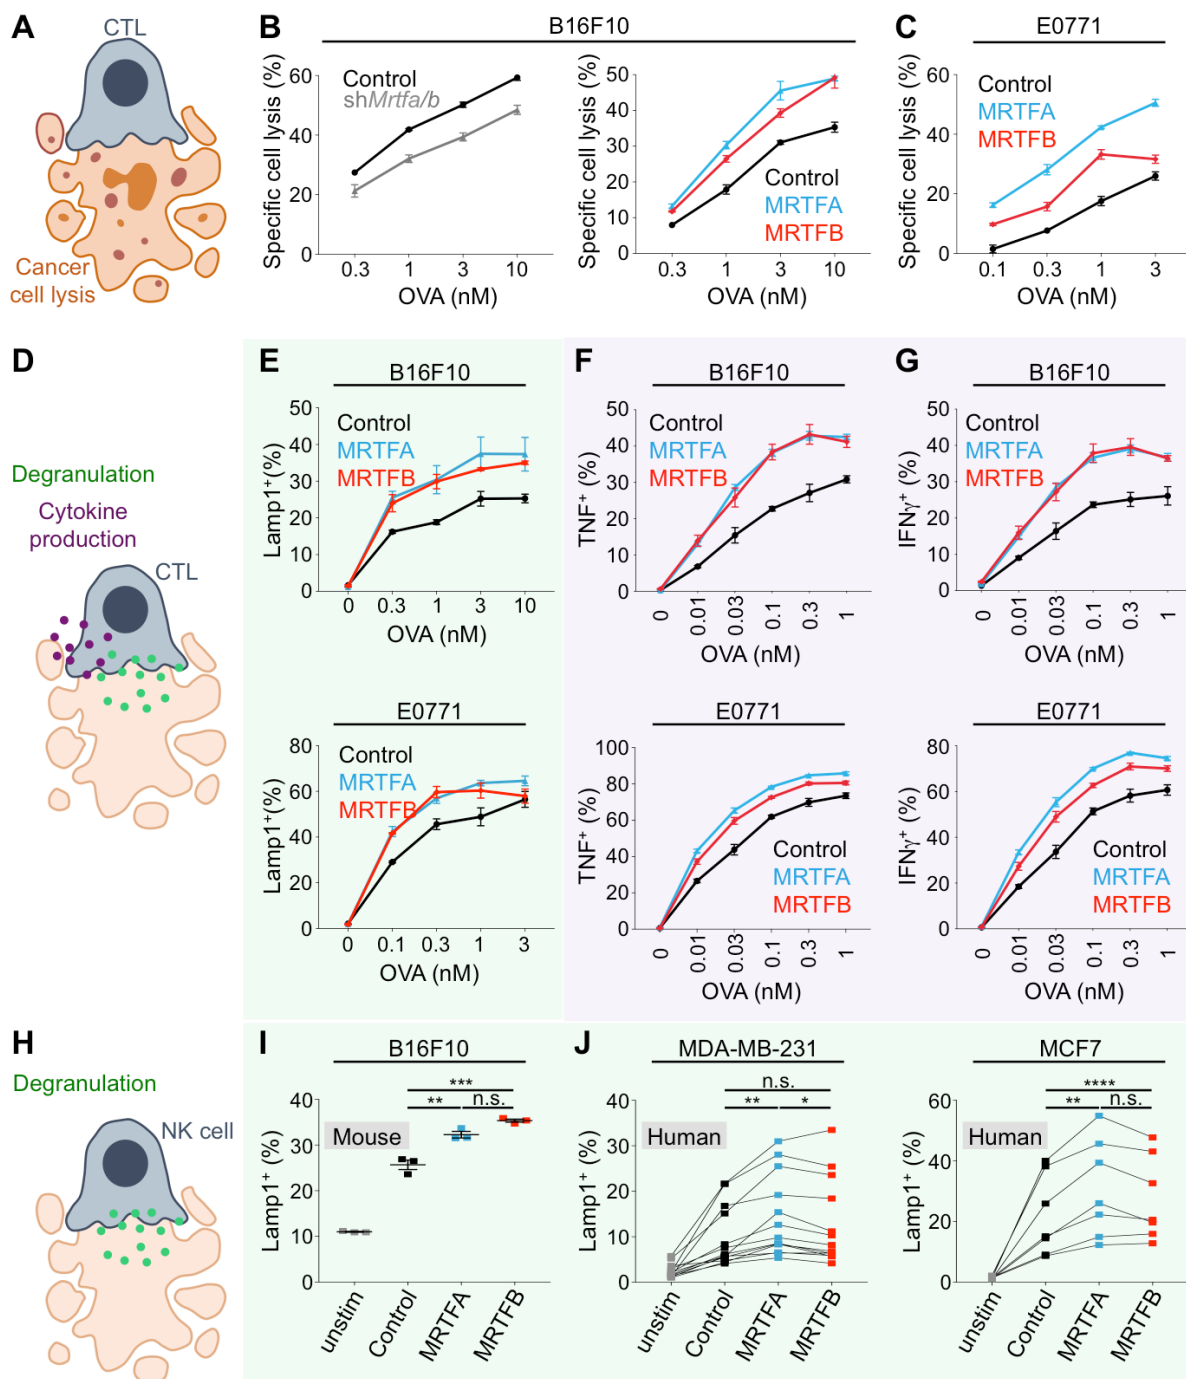

464

465 **Fig. 3. MRTF expression sensitizes cancer cells to CTL-mediated lysis.**

466 (A, D, H) Diagrams of CTL-mediated cancer cell lysis (A), CTL degranulation and cytokine  
 467 secretion after cancer cell recognition (D), and NK cell degranulation after cancer cell  
 468 recognition (H). (B-C, E-G) B16F10 or E0771 cell lines were loaded with increasing  
 469 concentrations of OVA and mixed with OT1 CTLs. (B) Specific lysis of control or *Mrtfa/b*  
 470 knockdown B16F10 cells (left) or B16F10 cells overexpressing MRTFA, MRTFB, or empty

471 vector (right) 5 h after mixing with CTLs. (C) Specific lysis of E0771 cells overexpressing  
472 MRTFA, MRTFB, or empty vector (right) 5 h after mixing with CTLs. (E) Degranulation,  
473 measured by surface exposure of CTL Lamp1 90 min after mixing with B16F10 and E0771 cells  
474 overexpressing MRTFA, MRTFB, or empty vector. (F-G) Production of TNF (F) and IFN $\gamma$  (G)  
475 measured by intracellular staining of CTLs 4 h after mixing with B16F10 and E0771 cells  
476 overexpressing MRTFA, MRTFB, or empty vector. (I) Splenic murine NK cells were mixed with  
477 B16F10 cells overexpressing MRTFA, MRTFB, or empty vector and degranulation quantified  
478 after 4 h. Data in B-C, E-G, and I are shown as mean  $\pm$  SEM of technical triplicates,  
479 representative of 3 independent experiments. (J) Human NK cell clones derived from peripheral  
480 blood were mixed with the indicated control and MRTFA/B overexpressing cell lines. After 5 h,  
481 NK cell degranulation was measured by surface exposure of Lamp1. Black lines indicate  
482 samples derived from the same donor. ( $n = 9$  donors for MCF7 experiments,  $n = 10$  donors for  
483 MDA-MB-231). \*\*\*\* $p \leq 0.0001$ , \*\*\* $p \leq 0.001$ , \*\* $p \leq 0.01$ , and \* $p \leq 0.05$ , and n.s.: not significant  
484 for  $p > 0.05$ , calculated by one-way ANOVA. See also Fig. S3.  
485

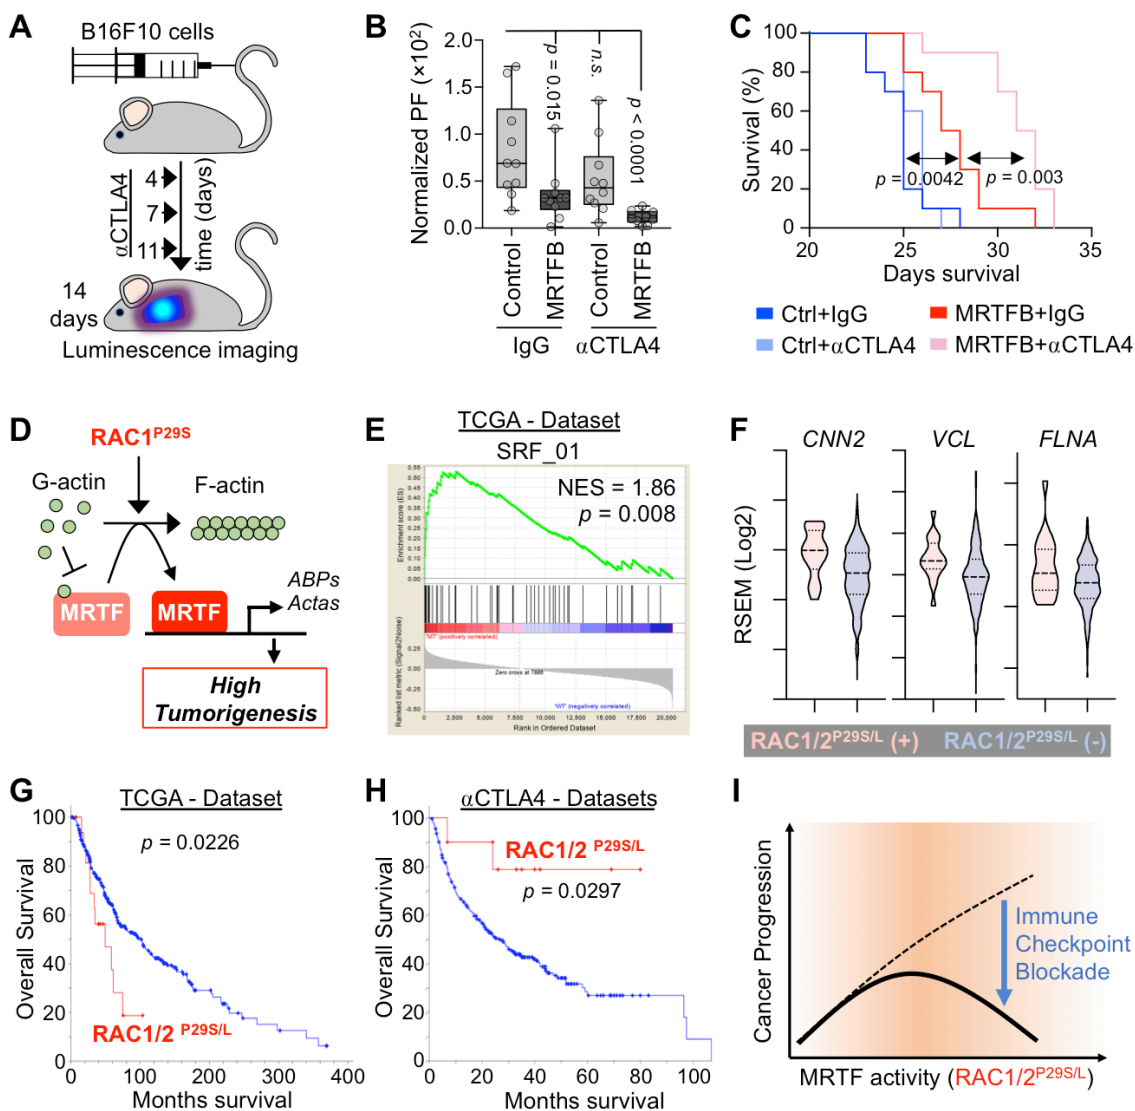

486  
 487 **Fig. 4. MRTF boosts therapeutic T cell responses in the context of anti-CTLA4 ICB.**  
 488 (A) Experimental design for anti-CTLA4 ( $\alpha$ CTLA4) treatment of mice inoculated with B16F10  
 489 melanoma. (B) BLI of mice 2 weeks after injection with B16F10 cells overexpressing MRTFB or  
 490 control vector and treatment with control IgG or anti-CTLA4 antibody ( $n = 10$  mice per group).  
 491 Box plots show upper and lower quartiles, median, maximum, and minimum values.  $p$  values  
 492 were calculated using Mann-Whitney test, n.s.: not significant for  $p = 0.1655$ . (C) Kaplan-Meier  
 493 survival curves for percent survival of mice in B ( $n = 10$  mice per group). (D) Model showing  
 494 oncogenic RAC1<sup>P29S</sup> driven activation of MRTF, leading to increased tumorigenicity (Lionarons  
 495 et al., 2019). *Acta*: actin family of proteins, *ABPs*: actin binding proteins. (E) GSEA showing  
 496 MRTF-SRF target gene expression enrichment in RAC1/2<sup>P29S/L</sup> mutant skin cutaneous  
 497 melanoma patients in The Cancer Genome Atlas (TCGA) dataset. NES: normalized enrichment

498 score. (F) Violin plots showing increased expression of known MRTF-SRF target genes in  
499 RAC1/2<sup>P29S/L</sup> patients. Dashed lines medians, dotted lines upper and lower quartiles. Pink and  
500 blue plots represent data from patients with or without RAC1/2<sup>P29S/L</sup> mutation, respectively. (G-H)  
501 Overall survival of RAC1/2<sup>P29S/L</sup> patients in the TCGA dataset (G) and in melanoma patients  
502 treated with anti-CTLA4 ICB in a pooled dataset (H), which was derived from Samstein et al.,  
503 2019 (75 patients); Miao et al., 2018 (144 patients); Van Allen et al., 2015 (20 patients);  
504 Catalanotti et al., 2017 (21 patients), and Liang et al., 2017 (14 patients). (I) MRTF activity  
505 induced by RAC1/2<sup>P29S/L</sup> potentiates melanoma progression (similar to Fig. 2E) but  
506 simultaneously sensitizes cancer cells to immune checkpoint blockade. *p* values in C, G, and H  
507 were calculated by Log-rank test. See also Fig. S4 and supplementary tables 1 and 2.  
508

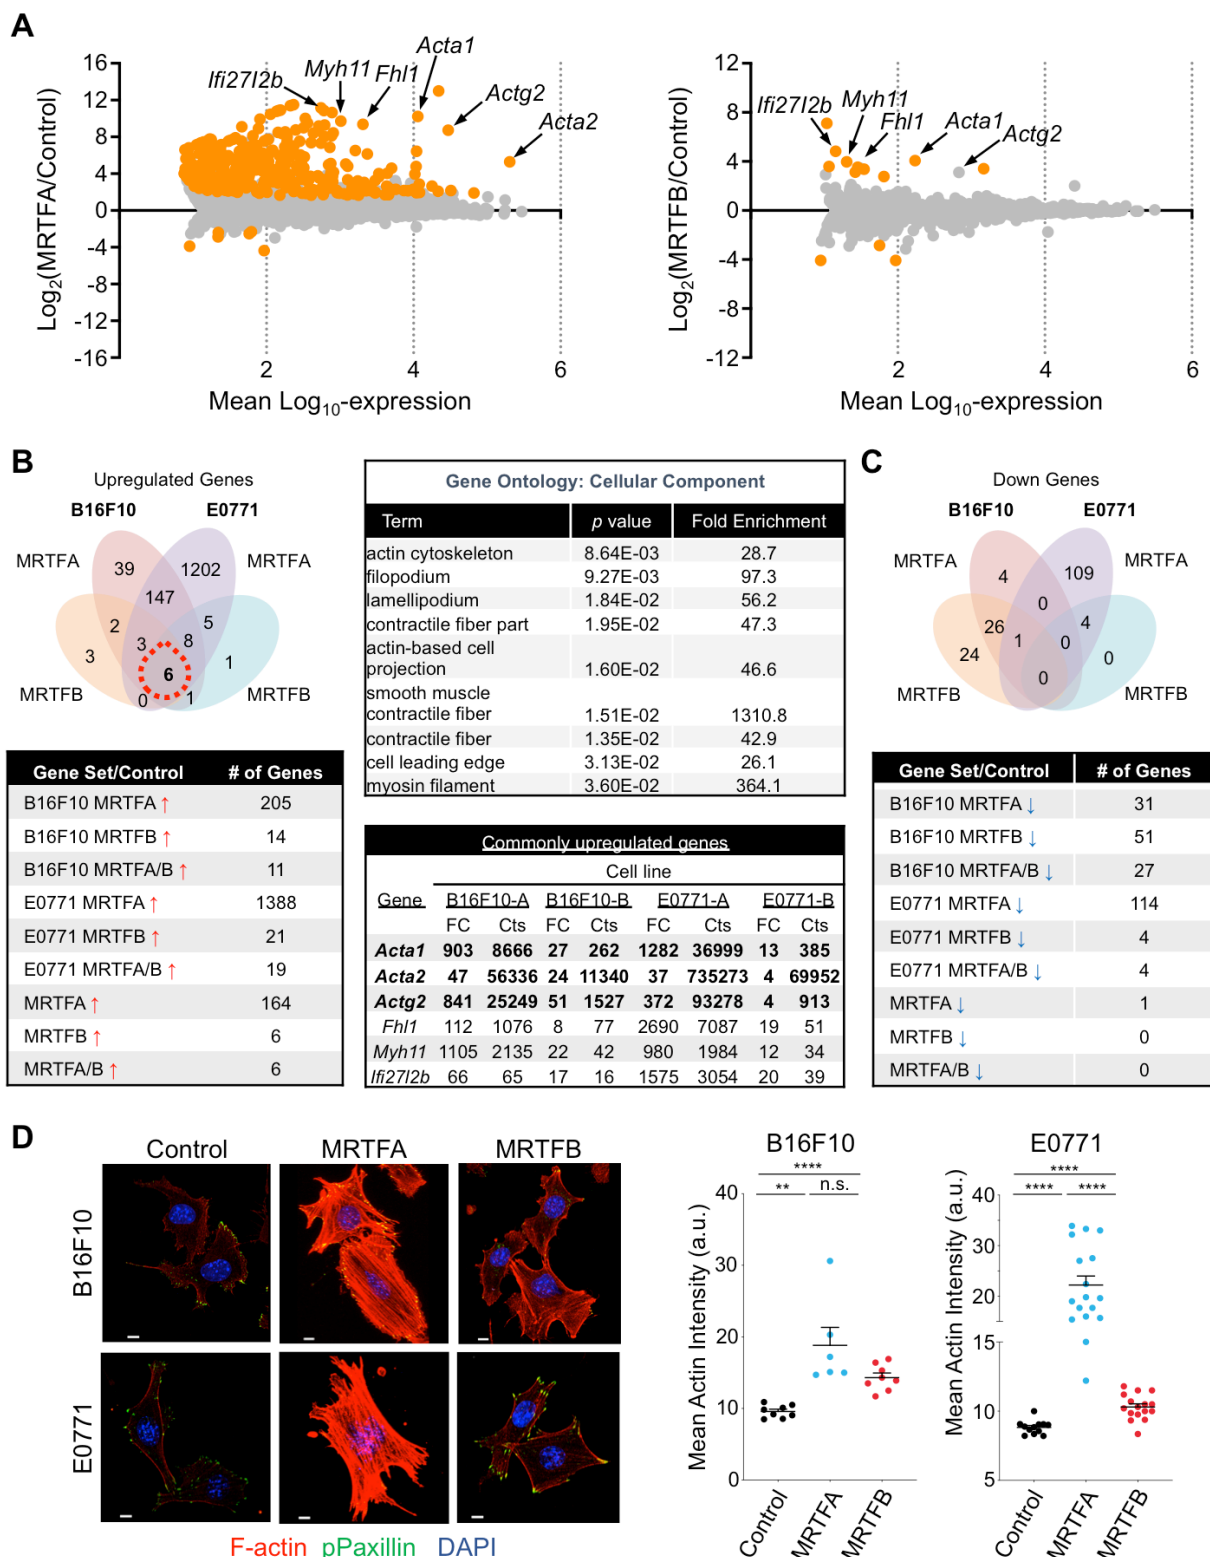

509

510 **Fig. 5. MRTF overexpression augments the F-actin cytoskeleton.**

511 (A) Mean-difference plots showing gene expression changes induced by MRTFA (left) and  
 512 MRTFB (right). Graphs incorporate data from both B16F10 and E0771 cells. Statistically

513 significant gene expression changes are colored orange ( $p \leq 0.05$ , adjusted for multiple testing  
514 using the Benjamini method). Strongly upregulated genes encoding actin isoforms and F-actin  
515 regulators are indicated. (B) Above left, Venn diagram of upregulated genes exclusive to or  
516 shared by B16F10 and E0771 cells overexpressing MRTFA or MRTFB in culture. Below left,  
517 table showing the number of upregulated genes for each group. Above right, Gene Ontology  
518 (GO) analysis using the set of genes upregulated in all cell lines (red dashed circle in Venn  
519 diagram). Statistically significant GO terms are shown, with reported  $p$  values corrected for  
520 multiple testing using the Benjamini method. Below right, table of commonly upregulated genes,  
521 in which genes with over 50 RNA sequence counts in all data sets are shown in bold. FC: Fold  
522 Change, Cts: RNA sequencing read counts. (C) Above, Venn diagram of downregulated genes  
523 exclusive to or shared between B16F10 and E0771 cells overexpressing MRTFA or MRTFB in  
524 culture. Below, table showing the number of downregulated genes for each group. (D) Left,  
525 confocal images of representative B16F10 and E0771 control, MRTFA, and MRTFB  
526 overexpressing cells, stained with DAPI (blue), phalloidin (F-actin, red) and anti-phospho-paxillin  
527 (green). Scale bars: 10  $\mu\text{m}$ . Right, graphs showing mean actin intensity for each cell line. Error  
528 bars denote SEM, n.s.: not significant for  $p > 0.05$ , \*\* $p \leq 0.01$ , \*\*\*\* $p \leq 0.0001$ ; two-tailed paired  
529 Student's t test;  $n \geq 8$  images per cell line; representative of 3 independent experiments. See  
530 also Fig. S5.  
531

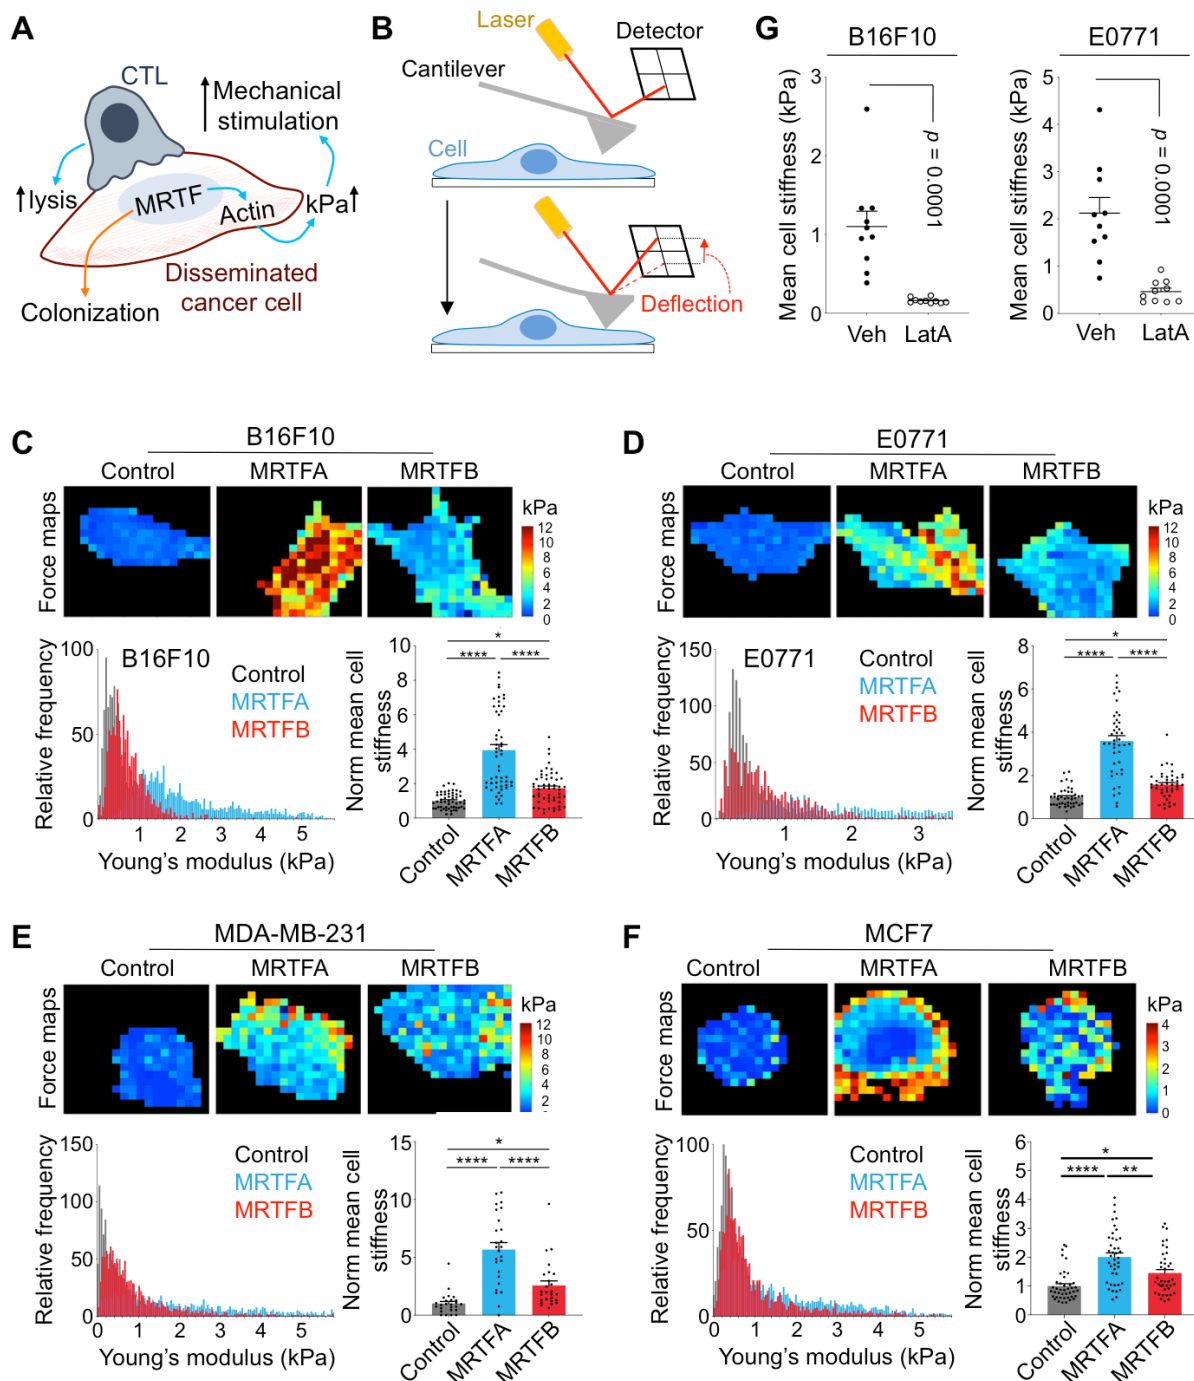

532

533 **Fig. 6. MRTF signaling increases cell stiffness.**

534 (A) MRTF activity promotes metastatic colonization but also sensitizes cancer cells to cytotoxic  
 535 lymphocytes by boosting actin polymerization and thereby increasing cell stiffness (kPa). (B)  
 536 Schematic diagram showing the AFM probe indentation approach. Cantilever deflection is  
 537 proportional to the loading force and is used to calculate the Young's modulus of a cell. (C-F)  
 538 AFM stiffness measurements comparing B16F10 (C), E0771 (D), MDA-MB-231 (E), and MCF7

539 (F) cells overexpressing MRTFA or MRTFB with respective control cell lines. Above, force maps  
540 of representative cells, with Young's modulus value (kPa) indicated in pseudocolor. Below left,  
541 probability histograms of pooled Young's modulus measurements (kPa) from representative  
542 experiments,  $n = 10$  cells. Below right, graphs of mean cell stiffness values normalized to the  
543 control. Data from 4 independent experiments are shown as mean  $\pm$  SEM (One-way ANOVA  
544 with Tukey's multiple comparisons test;  $*p \leq 0.05$ ,  $**p \leq 0.01$ ,  $****p \leq 0.0001$ ;  $n \geq 40$  cells per cell  
545 line). (G) Graphs showing mean cell stiffness of B16F10 (left) and E0771 (right) cells treated  
546 with vehicle (Veh) or with 100 ng/ml latrunculin A (LatA) for 20 min. Data shown as mean  $\pm$  SEM  
547 (two-tailed unpaired Student's t test;  $n = 10$  cells per condition), representative of 2 independent  
548 experiments. See also Fig. S6.  
549



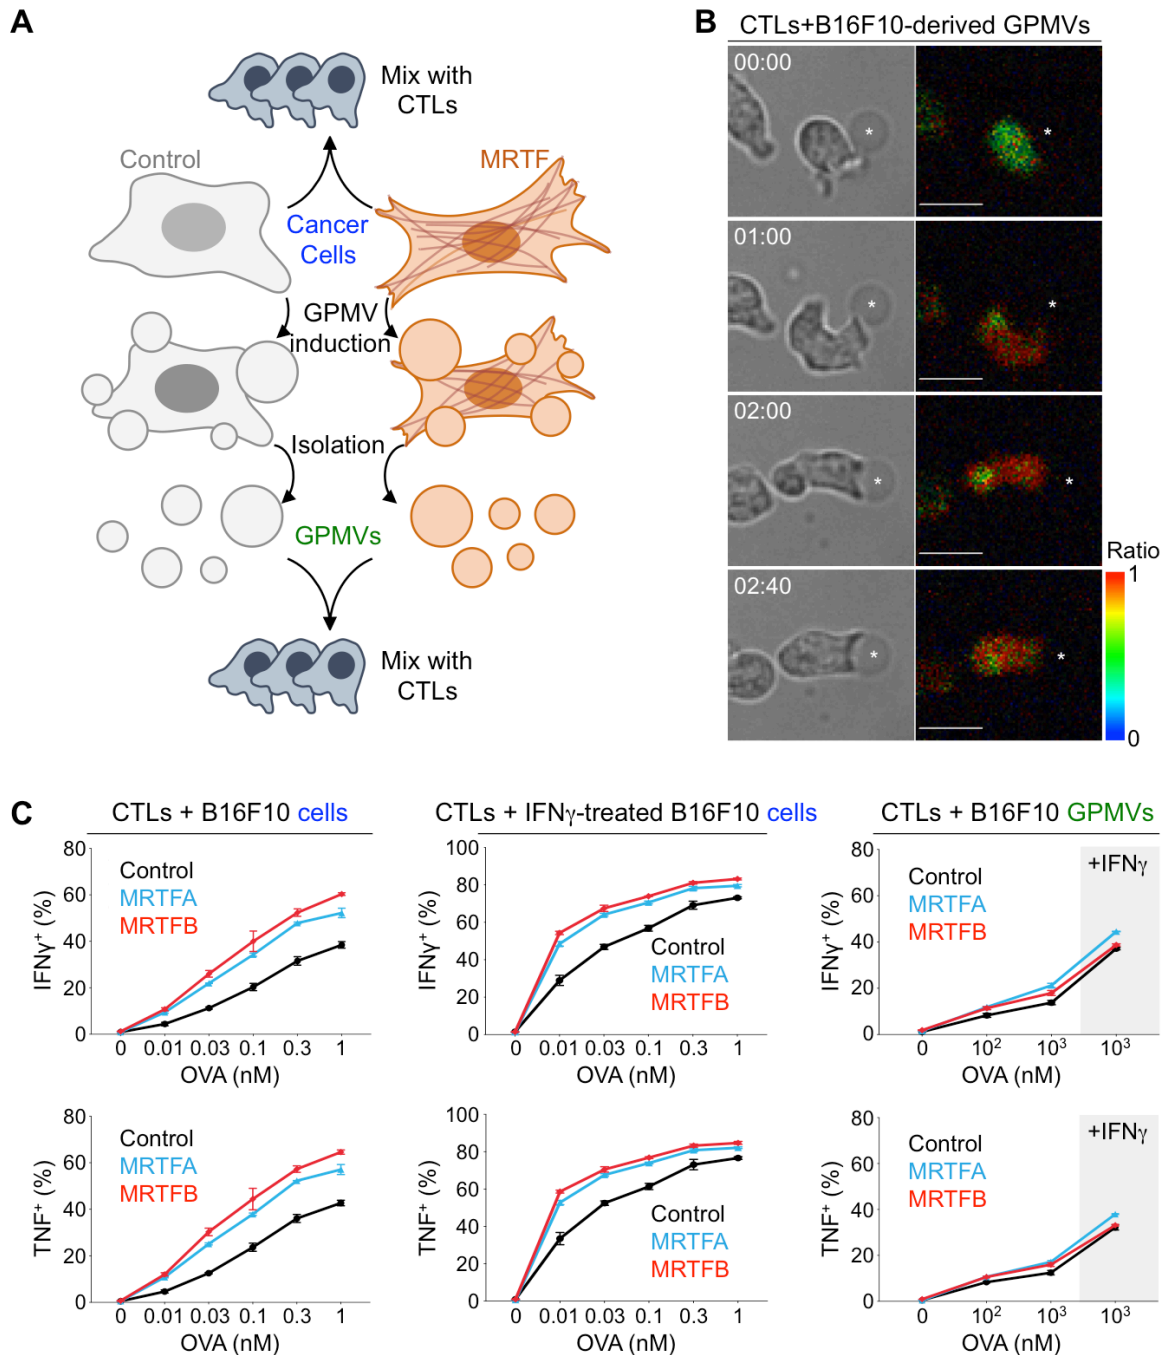

550

551 **Fig. 7. Cytoskeletal stiffness underlies the immune vulnerability of metastatic cells.**

552 CTLs were stimulated using OVA-loaded B16F10 cells or GPMVs derived from these cells. (A)

553 Schematic diagram of experimental design (see Methods). (B) Time-lapse montage of a

554 representative OT1 CTL  $Ca^{2+}$  response during contact with an OVA-loaded B16F10-derived

555 GPMV (asterisk). Bright field (left) and pseudocolored Fura-2 ratio (right) are shown. Time in

556 mm:ss is indicated in the upper left corner of each composite image. Scale bars: 10  $\mu$ m. Color

557 bar indicates the value of the Fura-2 ratio. (C) Graphs showing the percentage of CTLs

558 producing IFN $\gamma$  or TNF, measured by intracellular antibody staining 4 h after mixing with B16F10  
559 cells (left), B16F10 cells pretreated with IFN $\gamma$  (center), or GPMVs derived from untreated or  
560 IFN $\gamma$ -treated B16F10 cells (right). Data shown as mean  $\pm$  SEM of technical triplicates,  
561 representative of 3 independent experiments. See also Fig. S7.  
562

563 **METHODS**

564

565 **Constructs.**

566 Retroviral vectors for LifeAct-GFP, GFP, and TGL expression have been described (Le Floc'h et  
567 al., 2013; Ponomarev et al., 2004). Constructs for MRTFA/B silencing and overexpression were  
568 gifts from Ron Prywes (Addgene # 27161, #19846, and #27175). To generate inducible  
569 expression constructs, the coding sequences of MRTFA and MRTFB were PCR amplified and  
570 subcloned into the pRetroX-Tight-Hygro vector (Takara Bio, 631034). Doxycycline inducible  
571 expression was achieved by pLVX-TetON-Advanced (Takara Bio, 632162) expression.

572

573 **Mice and cell culture.**

574 The animal protocols used for this study were approved by the Institutional Animal Care and  
575 Use Committee of Memorial Sloan Kettering Cancer Center. Recipient C57BL/6J mice for *in*  
576 *vivo* assays were purchased from the Jackson Laboratory. To generate OT1 CTLs, T cells from  
577 OT1  $\alpha\beta$ TCR transgenic mice (Taconic) were mixed with congenic splenocytes pulsed with 100  
578 nM OVA and cultured in RPMI medium containing 10 % (vol/vol) FBS. Cells were supplemented  
579 with interleukin 2 (IL-2, 30 IU/ml, NIH BRB Repository) after 24 h and were split as needed in  
580 RPMI containing IL-2 and used for functional assays after 7 days in culture. Murine NK cells  
581 were isolated from C57BL/6J splenocytes by negative selection using an NK cell isolation kit  
582 (MACS, 130-115-818) and incubated overnight in 1000 U/ml IL-2. Human NK cells were isolated  
583 from peripheral blood samples obtained from healthy volunteer donors via the New York Blood  
584 Center (NYBC, <http://nybloodcenter.org/>). The Memorial Sloan Kettering Cancer Center  
585 Institutional Review Board (MSKCC IRB) waived the need for additional research consent for  
586 anonymous NYBC samples. Peripheral blood mononuclear cells (PBMCs) were purified from  
587 buffy coats by density gradient centrifugation (Ficoll-Paque Plus; GE Healthcare) and then  
588 cryopreserved in FBS with 10% DMSO. One day prior to the experiment, cells were thawed and  
589 incubated in clone media (DMEM, 30% Ham's F-12, 10% human serum, 1 mM sodium  
590 pyruvate, 1% MEM nonessential amino acids, 2 mM L-glutamine, 50 U/ml penicillin, 50  $\mu$ g/ml  
591 streptomycin) supplemented with 200 U/ml IL-2 (Proleukin, Prometheus) at 37 °C. B16F10 and  
592 E0771 cell lines were cultured in RPMI, while MCF7 and MDA-MB-231 cell lines were cultured  
593 in DMEM. Media were supplemented with 10 % FBS, 1 mM sodium pyruvate, 2 mM L-  
594 glutamine, 50 U/ml penicillin, and 50  $\mu$ g/ml streptomycin. All MDA-MB-231 experiments utilized  
595 the brain metastatic subline MDA-231Br (Bos et al., 2009). Cell lines to assess the effects of  
596 inducible MRTFA/B overexpression were prepared by sequential transduction with rTTA, TGL,

597 and either control or MRTF overexpression vectors, followed by culture in G418 and  
598 hygromycin. MRTF expression was induced by treating cells with 500 ng/ml doxycycline hyclate  
599 (Sigma) 24-48 h prior to the experiment.

600

#### 601 **Metastasis assays.**

602  $2 \times 10^5$  B16F10 or E0771 cells were injected into the tail vein of 4-6 week old C57BL/6J mice  
603 (Jackson Labs, 000664). Doxycycline was included in the mouse food (2500 mg/kg) to maintain  
604 MRTF expression for the duration of the experiment. Mouse hair was removed using clippers to  
605 prevent interference with bioluminescent imaging (BLI). Lung metastasis burden was quantified  
606 weekly using retro-orbital D-luciferin (150 mg kg<sup>-1</sup>) injection followed by imaging via the IVIS  
607 Spectrum Xenogen instrument (Caliper Life Sciences) installed with Living Image software  
608 v.2.50. Metastatic load per mouse was calculated by dividing the total photon flux signal at the  
609 end point of the experiment by the total photon flux measured immediately after cancer cell  
610 delivery on the day of injection. NK cell depletion was performed by injecting mice  
611 intraperitoneally (i.p.) with anti-asialo GM1 antibody (Wako Chemicals, 986-10001) as  
612 previously described (Er et al., 2018) 6 days and 1 day before tail vein injection of cancer cells  
613 and once a week thereafter. CD8 positive T cell depletion was achieved using 250 µg  
614 InVivoMab anti-mouse CD8α antibody (clone 53-6.7, BioXCell, BE0004-1) or IgG2a control  
615 (BioXCell, BE0089), injected 2 days and 1 day before tumor delivery and once every week  
616 thereafter. Immune checkpoint blockade was achieved by injecting mice i.p. with 125 µg anti-  
617 CTLA-4 (clone 9D9) or mouse control IgG2b (clone MPC-11) antibodies 4 days after delivery of  
618 cancer cells.

619

#### 620 **Killing, lytic granule secretion, and cytokine production assays.**

621 For the CTL functional assays, cancer cell targets were cultured overnight on fibronectin-coated  
622 96-well plates. They were then loaded with varying concentrations of OVA for 2 h and washed  
623 three times in medium. To assess killing, OT1 CTLs were added at a 4:1 effector to target (E:T)  
624 ratio and incubated for 5 h at 37 °C in culture medium. Cells were then labeled with APC  
625 conjugated anti-CD8a antibody (Tonbo Biosciences, 20-0081), and specific lysis of target cells  
626 (GFP<sup>+</sup>, CD8<sup>-</sup>) was determined by propidium iodide (PI, Thermo Fisher Scientific) incorporation  
627 using flow cytometry. To assess lytic granule secretion, the E:T ratio was 2:1, and cells were  
628 incubated for 90 min at 37 °C in the presence of eFluor660 conjugated anti-Lamp1 antibody (1  
629 µg/ml, Clone 1D4B, eBiosciences). Cells were then labeled with anti-CD8a antibody, and the  
630 percentage of CTLs (CD8<sup>+</sup>) with positive Lamp1 staining was quantified by flow cytometry. To

631 assess cytokine production, the E:T ratio was 2:1, and cells were incubated for 4 h at 37 °C in  
632 the presence of BD GolgiPlug™ protein transport inhibitor (BD Biosciences). Cells were then  
633 labeled with anti-CD8a antibody and a dead cell marker (Live/Dead Fixable Aqua Dead Cell  
634 Stain Kit), fixed, and permeabilized using the BD Cytotfix/Cytoperm™ kit. After labeling with PE  
635 conjugated anti-TNF (BioLegend, 506306) and PE/Cy7 conjugated anti-IFN $\gamma$  (BioLegend,  
636 505826) antibodies, the percentage of CTLs (CD8<sup>+</sup>) expressing TNF and IFN $\gamma$  was determined  
637 by flow cytometry. All functional assays were performed in triplicate. For mouse NK cell  
638 functional assays, cancer cell targets were cultured overnight on fibronectin-coated 96-well  
639 plates. They were then mixed with NK cells at a 1:1 ratio and incubated for 6 h at 37 °C in the  
640 presence of eFluor660 conjugated anti-Lamp1 antibody. Subsequently, cells were labeled with  
641 PerCP-Cy5.5 conjugated anti-NK1.1 antibody (eBioscience, 45-5941-82) and the percentage of  
642 NK1.1<sup>+</sup> cells with positive Lamp1 staining was quantified by flow cytometry. For human NK cell  
643 functional assays, cancer cell targets were cultured overnight on fibronectin-coated 96-well  
644 plates. To assess NK cell degranulation,  $2 \times 10^5$  PBMCs were added to each well (NK cells  
645 comprise 5-15 % of PBMCs) in the presence of monensin (GolgiSTOP™; 1:1,000 dilution; BD)  
646 and Brilliant Violet 786-labeled anti-Lamp1 mAb (clone SJ25C1, BD Horizon) for 5 h at 37 °C.  
647 After incubation, cells were collected in a 96-well V-bottom plate, washed and stained with dead  
648 cell marker (Live/Dead Fixable Near IR Dead Cell Stain Kit), ECD-labeled anti-CD56 mAb  
649 (Beckman Coulter), BV650-labeled anti-CD3 mAb (clone UCHT1, BD Horizon), and PE-labeled  
650 anti-NKG2D (clone 1D11, BioLegend). Finally, cells were washed in 1% FBS/PBS and  
651 subjected to flow cytometry (LSR Fortessa). All flow cytometric analysis was performed using  
652 FlowJo software.

653

#### 654 ***In vitro* cell growth and proliferation assays.**

655 To assess cell viability, the CellTiter-Glo® Luminescent Cell Viability Assay Kit (Promega,  
656 G7570) was used according to manufacturer instructions. To assess cell proliferation, cells were  
657 labeled with CellTrace Violet (CTV, Thermo Fisher) according to manufacturer instructions, and  
658 CTV dilution was quantified by flow cytometry.

659

#### 660 **Cell death assays.**

661 Cell death was induced by treating cells seeded on fibronectin-coated 96 well plates with  
662 varying concentrations of staurosporine (Cell Signaling Technology), FasL (PeproTech), TNF  
663 (PeproTech), and granzyme B (BioLegend). Granzyme B was activated using Cathepsin  
664 C/DPPI (R&D Systems) according to manufacturer instructions, and applied to cells in

665 combination with a sublytic concentration of perforin, which was purified as previously described  
666 (Basu et al., 2016). Cell death after 5 h treatment was quantified by PI incorporation or using the  
667 Caspase Glo system (Promega) according to manufacturer instructions.

668

#### 669 **Transcriptome sequencing and analysis.**

670 RNA was collected using the RNeasy Mini Kit (Qiagen, 74106) according to manufacturer  
671 instructions. After RiboGreen quantification and quality control by Agilent BioAnalyzer, 500 ng of  
672 total RNA underwent polyA selection and TruSeq library preparation according to instructions  
673 provided by Illumina (TruSeq Stranded mRNA LT Kit), with 8 cycles of PCR. Samples were  
674 barcoded and run on a HiSeq 4000 in a 50bp/50bp paired end run, using the HiSeq 3000/4000  
675 SBS Kit (Illumina). An average of 41 million paired reads was generated per sample and the  
676 average fraction of mRNA bases was 74%. Output data were mapped to the target genome with  
677 the maStar aligner (Dobin et al., 2013) using the 2 pass mapping method (Engstrom et al.,  
678 2013). After postprocessing with PICARD, the expression count matrix was computed using  
679 HTSeq ([www-huber.embl.de/users/anders/HTSeq](http://www-huber.embl.de/users/anders/HTSeq)). The raw count matrix generated by HTSeq  
680 was then processed in DESeq ([www-huber.embl.de/users/anders/DESeq](http://www-huber.embl.de/users/anders/DESeq)) to normalize the full  
681 dataset and analyze differential expression between sample groups. Gene Ontology analysis of  
682 Biological Processes and Cellular Components was performed using the DAVID 6.8 Functional  
683 Annotation Tool (Huang da et al., 2009) with Benjamini correction for multiple hypothesis testing  
684 and a cut-off of 2 genes minimum per cluster. Each Gene Ontology table in Fig. 5 and Fig. S5  
685 lists the 10 annotation clusters with the highest enrichment scores and lowest  $p$  values below  $p$   
686  $\leq 0.05$ .

687

#### 688 **Analysis of clinical data.**

689 Patient analysis was carried out using cBioportal (Cerami et al., 2012; Gao et al., 2013). The  
690 TCGA PanCancer Atlas database (Ellrott et al., 2018; Gao et al., 2018; Hoadley et al., 2018; Liu  
691 et al., 2018; Sanchez-Vega et al., 2018; Taylor et al., 2018) was used for survival analysis of  
692 RAC1/2<sup>P29S/L</sup> skin cutaneous melanoma patients (Supplementary Table 1). Gene set enrichment  
693 analysis (GSEA) of SRF target gene expression enrichment was performed using data from  
694 TCGA skin cutaneous melanoma patients that were positive or negative for the following  
695 mutations: RAC1/2<sup>P29S/L</sup>, NF1 truncation mutant, PPP6C<sup>R264C</sup>, FBXW7 mutant, and IDH1<sup>R132C/L</sup>.  
696 RNA-sequencing read count estimation values using RNA-Seq by Expectation Maximization  
697 (RSEM) were downloaded from the Genomics Data Commons Data Portal. The SRF\_01 gene  
698 set (M12047) from the Molecular Signatures Database (MSigDB v7.0) was used for GSEA

699 analysis. For heatmap analysis, RAC1/2<sup>P29S/L</sup>(+) and RAC1/2<sup>P29S/L</sup>(-) samples were grouped and  
700 clustered using leading genes in the SRF\_01 gene set GSEA. For survival analysis of  
701 RAC1/2<sup>P29S/L</sup>, NF1 truncation mutant, PPP6C<sup>R264C</sup>, FBXW7 mutant, and IDH1<sup>R132C/L</sup> patients  
702 treated with anti-CTLA4, patients that underwent anti-CTLA4 therapy were selected from  
703 reference studies (Catalanotti et al., 2017; Liang et al., 2017; Miao et al., 2018; Samstein et al.,  
704 2019) (Supplemental Table S2).

705

#### 706 **Image analysis.**

707 To quantify F-actin intensity in fixed cells, each image was subjected to intensity thresholding in  
708 Imaris (Bitplane) to establish the space occupied by cells, after which the average intensity of  
709 Alexa Fluor 594-labeled phalloidin within the cellular volume was determined. To quantify *in vivo*  
710 proliferation, mouse lungs bearing metastatic tumors were paraffin embedded, sectioned into 5  
711  $\mu\text{m}$  thick slices, stained for Ki67 (Cell Signaling Technologies, 9129) together with DAPI, and  
712 imaged using a 3DHISTECH Panoramic Scanner with a 20  $\times$  objective lens. The number of  
713 cell nuclei (DAPI) and proliferating cells (Ki67) were counted using automated segmentation.  
714 Code available upon request.

715

#### 716 **Cell surface proteins.**

717 Target cells were gently detached using Trypsin/EDTA and washed prior to antibody staining.  
718 B16F10 and E0771 cells were stained with APC-labeled anti-Fas (clone SA367H8, BioLegend),  
719 PE-labeled anti-H2Kb (clone AF6-88.5, BioLegend), PE-labeled anti-H2Db (clone 28-14-8,  
720 eBioscience), and mouse NKG2D-Fc (kind gift from J. C. Sun) followed by a PE-labeled  
721 secondary antibody. MDA-MB-231 and MCF7 cells were stained with PE-labeled anti-MICA/B  
722 (clone 6D4, BD Pharmingen) and PE-Cy5-labeled anti-HLA-ABC (G46-2.6, BD Pharmingen).  
723 Surface expression was then quantified by flow cytometry.

724

#### 725 **Atomic Force Microscopy (AFM).**

726 Cells were seeded on glass-bottom petri dishes (FluoroDish FD5040) coated with fibronectin  
727 (from bovine plasma, Millipore Sigma) and then kept in complete RPMI medium with 10 mM  
728 HEPES pH 7.0 during the acquisition of stiffness maps. Experiments were performed at 37 °C  
729 with an MFP-3D-BIO AFM microscope (Oxford Instruments) using cantilevers with 5  $\mu\text{m}$   
730 diameter colloidal borosilicate probes (nominal spring constant  $k = 0.1 \text{ N/m}$ , Novascan). Before  
731 each experiment, the exact spring constant of the cantilever was determined using the thermal  
732 noise method and its optical sensitivity determined using a PBS-filled glass bottom petri dish as

733 an infinitely stiff surface. 10-12 cells from each experimental group were tested in each session.  
734 Bright field images of each cell were collected during AFM measurements using an inverted  
735 optical objective (Zeiss AxioObserver Z1) integrated with the AFM. Stiffness maps of  $60 \times 60$   
736  $\mu\text{m}^2$  ( $18 \times 18$  points) were collected in areas containing both cells and substrate at 1.5 Hz for a  
737 single approach/withdraw cycle. A trigger point of 1 nN was used to ensure sample penetration  
738 of 1-2  $\mu\text{m}$ . Force curves in each map were fitted according to the Hertz model (Igor Pro,  
739 Wavemetrics). Data fitting was performed in the range from 0 to 50% of the maximum applied  
740 force to consider only measurements within the first 1  $\mu\text{m}$  of indentation. The following settings  
741 were used: tip Poisson  $\nu_{\text{tip}} = 0.19$ , tip Young's modulus  $E_{\text{tip}} = 68$  GPa, and sample Poisson  
742  $\nu_{\text{sample}} = 0.45$ . Stiffness histograms were obtained by identifying the stiffness values belonging to  
743 each cell (and not the substrate values, shown in black on force maps) through a mask and  
744 plotting the results from each cell line as a single population. All measurements made  $< 500$  nm  
745 above the substrate were excluded. Extraction of the stiffness from the raw Igor Binary Wave  
746 (.ibw) data with an overlapped mask was obtained by means of a home-built routine  
747 implemented in Igor (Igor Pro, Wavemetrics). Stiffness distribution histograms were obtained  
748 using the histogram analysis tool in Excel (Microsoft) after normalizing for the total number of  
749 data points.

750

#### 751 **Giant plasma membrane vesicle (GPMV) isolation and purification.**

752 GPMVs were generated as previously described (Sezgin et al., 2012) with minor modifications  
753 for scale and cell type.  $1.5 \times 10^6$  cells were seeded in a  $10 \text{ cm}^2$  dish and incubated for 18 h with  
754 or without 25 ng/ml IFN $\gamma$  and the indicated concentrations of OVA peptide. Cells were then  
755 transferred into 5 ml of GPMV buffer (10 mM HEPES, 150 mM NaCl, 2 mM CaCl $_2$ , 25 mM PFA,  
756 2 mM DTT, pH 7.4) for 1 h at 37 °C. To purify GPMVs, the suspension was centrifuged at  $100 \times$   
757 g for 10 min to pellet cell debris, and then the supernatant was centrifuged at  $2000 \times$  g for 1 h at  
758 4 °C to pellet the GPMVs. For lymphocyte stimulation, GPMVs were washed and then  
759 resuspended in 500  $\mu\text{l}$  of cell culture medium. 100  $\mu\text{l}$  of this purified GPMV sample was then  
760 mixed with  $10^4$  CTLs in a v-bottom 96-well plate and incubated for the indicated times. For  
761 immunoblot analysis of GPMV protein content, GPMV pellets were resuspended in  $1 \times$  Alfa  
762 Aesar Laemmli SDS Sample Buffer (Fisher Scientific, AAJ61337AC) prior to gel electrophoresis.  
763 For imaging studies (Fig. S7A), B16F10 cells transiently transfected with GFP or LifeAct-GFP  
764 were labeled with CellMask™ Orange Plasma Membrane Stain according to manufacturer  
765 instructions, and then either imaged or used to generate GPMVs for imaging.

766



767 **Ca<sup>2+</sup> imaging of CTLs and GPMVs.**

768 CTLs were loaded with 5 µg/ml Fura-2AM and then added to poly-L-lysine-coated chambers  
769 containing GPMVs derived from OVA-loaded B16F10 cells. Fura-2 images using 340 nm and  
770 380 nm excitation were acquired every 30 seconds for 20 min, using a 20 × objective lens fitted  
771 to an IX-81 microscope stage (Olympus).

772

773 **Statistics.**

774 Analyses were carried out using either representative experiments or pooled data as indicated  
775 (*n* is defined in the figure legends for each experiment). Statistical tests (two-tailed Mann-  
776 Whitney, two-tailed ANOVA, paired and unpaired two-tailed t tests and Log-rank Mantel-Cox  
777 tests) were performed using GraphPad Prism. Log-rank tests for patient survival were  
778 implemented in cBioportal (Cerami et al., 2012; Gao et al., 2013). Unless otherwise indicated,  
779 error bars denote SEM. No statistical methods were used to determine sample size prior to  
780 experiments.

781

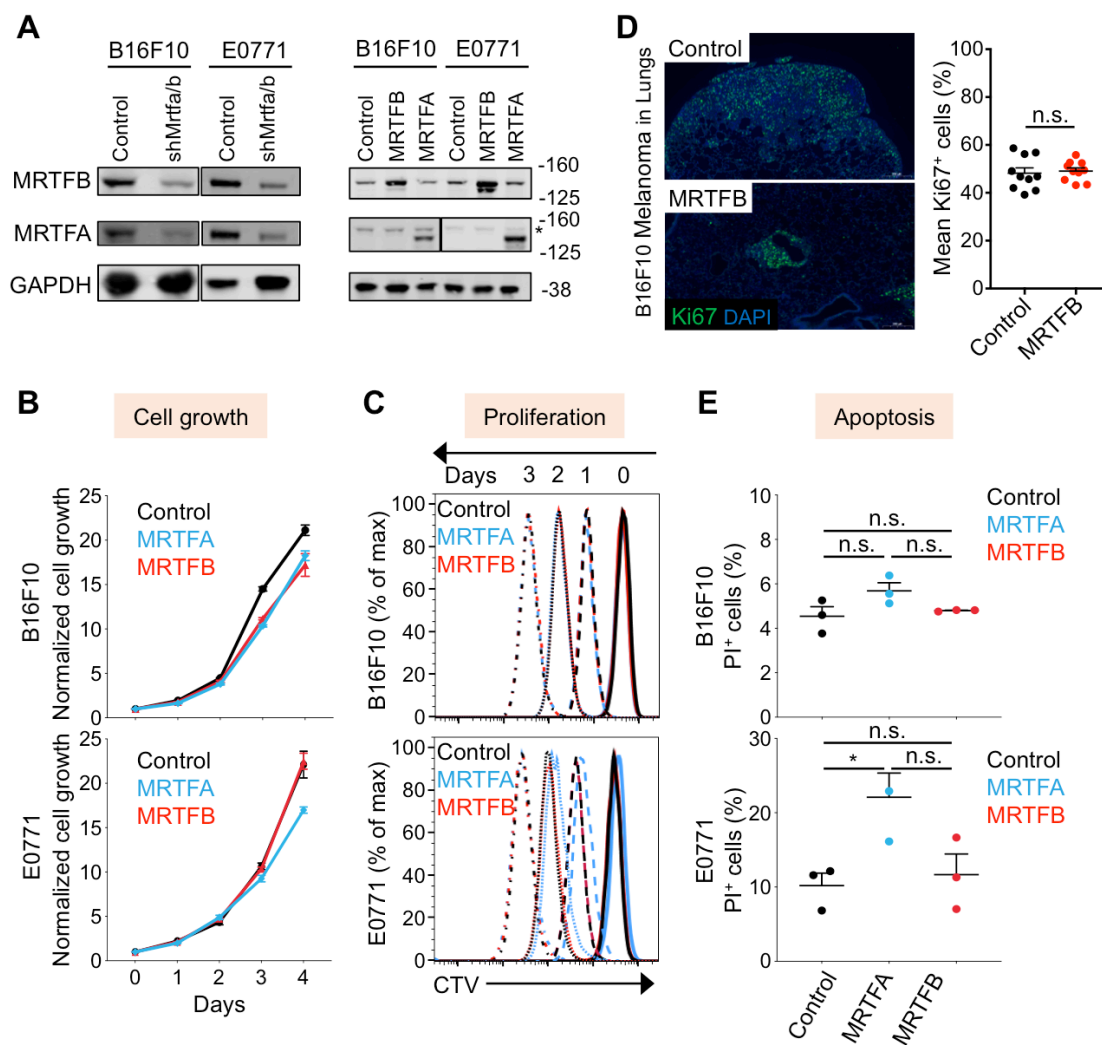

782

783 **Fig. S1. MRTF does not affect cancer cell growth, proliferation or apoptosis.**

784 Related to Fig. 1 and 2. (A) Representative western blots showing MRTFA/B expression levels  
 785 in the indicated B16F10 and E0771 cell lines. \* indicates endogenous MRTFA. (B) Cellular  
 786 growth kinetics of the indicated B16F10 (above) and E0771 (below) cell lines, measured by  
 787 CellTiterGlo normalized to first day of plating (Day 0). Error bars: SEM.  $n = 3$  technical  
 788 replicates. Results are representative of two independent experiments. (C) Cellular proliferation  
 789 measured by CTV (Cell Trace Violet) dilution, after CTV staining on day 0. Data are  
 790 representative of 3 independent experiments. (D) Left, immunofluorescence images showing  
 791 proliferative state (Ki67, green) of B16F10 melanoma cells expressing control vector or MRTFB  
 792 during lung colonization of syngeneic mice. DAPI, nuclear stain, blue. Right, quantification of  
 793 Ki67 staining, with data shown as mean  $\pm$  SEM, n.s.: not significant for  $p > 0.05$ ; two-tailed  
 794 unpaired Student's t test ( $n = 10$  mice per group). (E) Graphs showing the percentage of cell

795 apoptosis quantified by propidium iodide (PI) incorporation. Data from 3 independent  
796 experiments shown as mean  $\pm$  SEM (One-way ANOVA with Tukey's multiple comparisons test;  
797 n.s.: not significant for  $p > 0.05$ ,  $*p \leq 0.05$ ).  
798

799

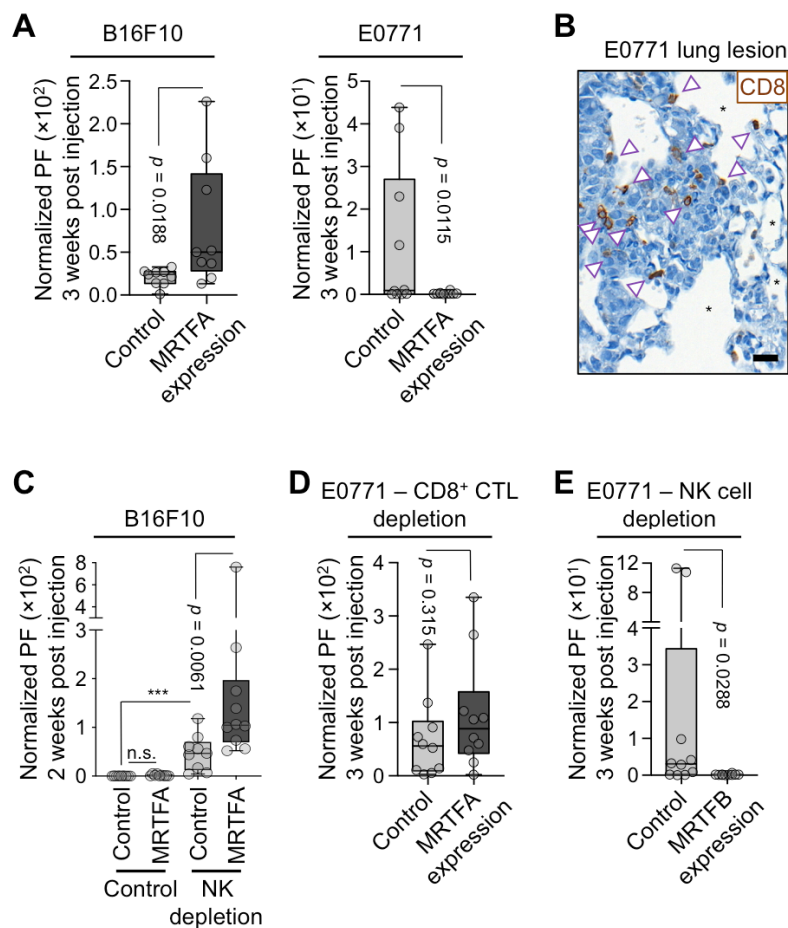

800

801 **Fig. S2. Immune vulnerability of cancer cells during metastatic colonization.**

802 Related to Fig. 1 and 2. (A) BLI of mouse lungs 3 weeks post tail vein injection with B16F10  
 803 melanoma (left) or E0771 breast cancer (right) cells overexpressing empty vector or MRTFA ( $n$   
 804 = 9 mice per group). (B) Representative IHC images of CD8<sup>+</sup> T cell (brown arrowheads, CD8  
 805 staining) infiltration in E0771 breast cancer lung metastases. \*: alveolar space, Scale bar: 20  
 806  $\mu$ m. (C) BLI of mouse lungs 2 weeks after tail vein injection with B16F10 cells with or without NK  
 807 cell depletion using anti-Asialo GM1 antibody, showing sensitivity of MRTFA expressing cells to  
 808 NK cells during lung colonization. n.s. :not significant,  $p = 0.077$ ,  $***p < 0.0001$  ( $n = 10$  mice for  
 809 MRTFA, NK cell depletion and  $n = 9$  mice for others). (D-E) BLI of mice pretreated with anti-CD8  
 810 antibody (D) or anti-asialo GM1 antibody (E) for T and NK cell depletion, respectively, and  
 811 imaged 3 weeks after injection of indicated cancer cells ( $n = 10$  mice per group).  $p$  values were  
 812 calculated by Mann-Whitney test.

813

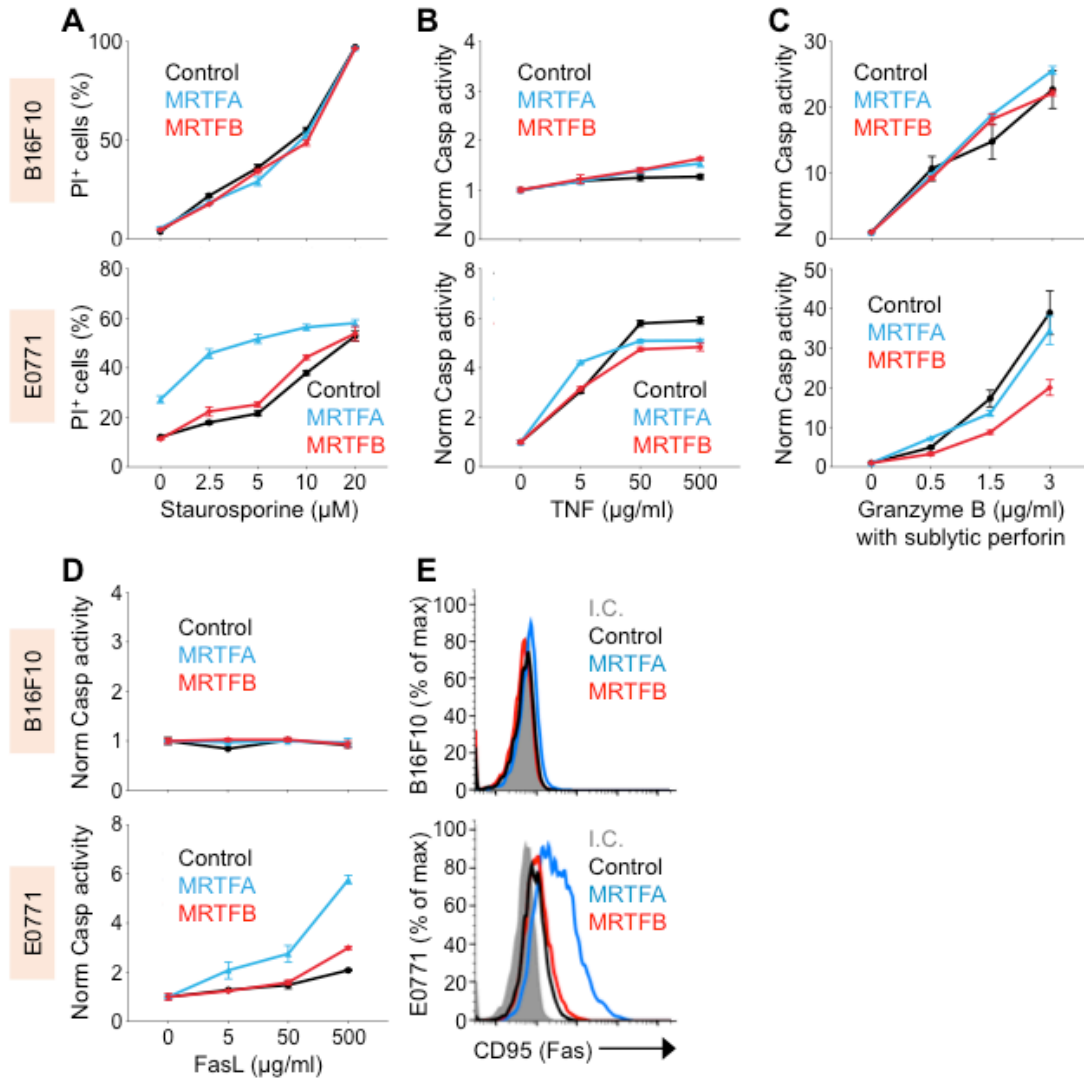

814

815 **Fig. S3. MRTF does not increase cancer cell sensitivity to apoptotic insults.**

816 Related to Fig. 3. (A-D) B16F10 (top) and E0771 (bottom) control and MRTFA or MRTFB  
 817 overexpressing cell lines were treated with the indicated concentrations of staurosporine (A),  
 818 TNF (B), granzyme B plus a sublytic concentration of perforin (C), or FasL (D) and cell  
 819 apoptosis was quantified by propidium iodide (PI) incorporation (A) or the caspase Glo 3/7  
 820 assay system after normalization to each cell line's untreated samples (B-D). All data shown as  
 821 mean ± SEM of technical triplicates, representative of 2 independent experiments. (E) Flow  
 822 cytometric analysis of Fas on the indicated control and MRTFA/B overexpressing cell lines.  
 823 Isotype control (I.C.) is shown in gray. Histograms representative of 3 independent experiments.

824

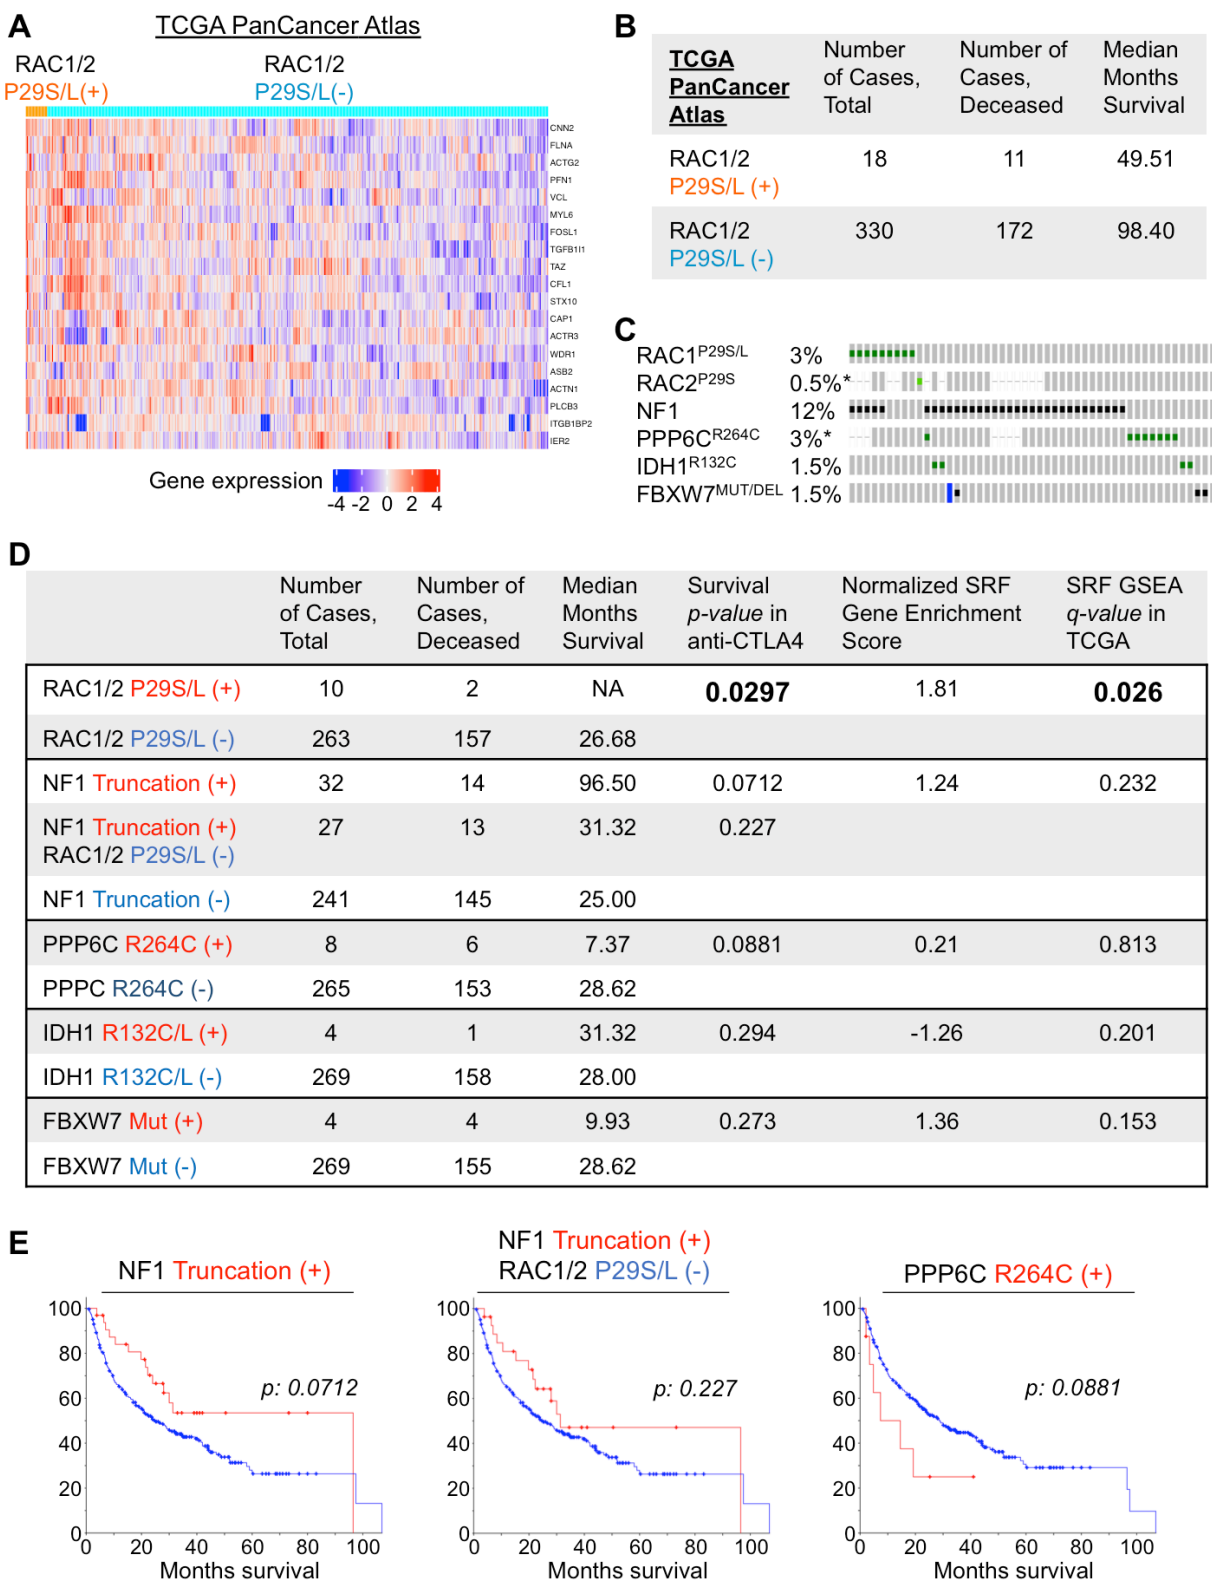

825

826

**Fig. S4. An MRTF-SRF gene signature correlates with responsiveness to ICB.**

827 Related to Fig. 4. (A) Heat map representation of differential gene expression z-scores for the  
828 leading genes in the MRTF-SRF gene signature applied to the TCGA PanCancer Atlas skin  
829 cutaneous melanoma dataset. (B) Total number of patients, their RAC1/2 mutational and vital  
830 status, and median patient survival in months for the TCGA skin cutaneous melanoma data set.  
831 (C) Oncoprint showing the overlap between distinct sets of mutations in patients from the anti-  
832 CTLA4 cohort analyzed in Fig. 4H. Each grey bar is a profiled patient, with dashes representing  
833 no available data on a particular gene. Color-coding on each bar represents a mutation or a  
834 genomic alteration annotated as oncogenic by oncoKB. Green and black squares are oncogenic  
835 driver point mutations and truncations, respectively. Blue bars denote deep genomic deletions.  
836 n = 273 patients. \* indicates that not all patients were profiled for the queried genomic event.  
837 Patients with no alterations were included in the analyses but were cropped from the panel for  
838 simplicity. (D) Survival statistics for mutations depicted in C. The first four columns contain  
839 statistics from the anti-CTLA4 cohort, while the last two columns of SRF signature statistics are  
840 derived from the TCGA skin cutaneous melanoma cohort. Bolded values are statistically  
841 significant. (E) Kaplan-Meier curves showing overall survival of melanoma patients from the  
842 anti-CTLA4 cohort bearing the indicated UV-induced mutations. *p* values were calculated by  
843 Log-rank test.  
844

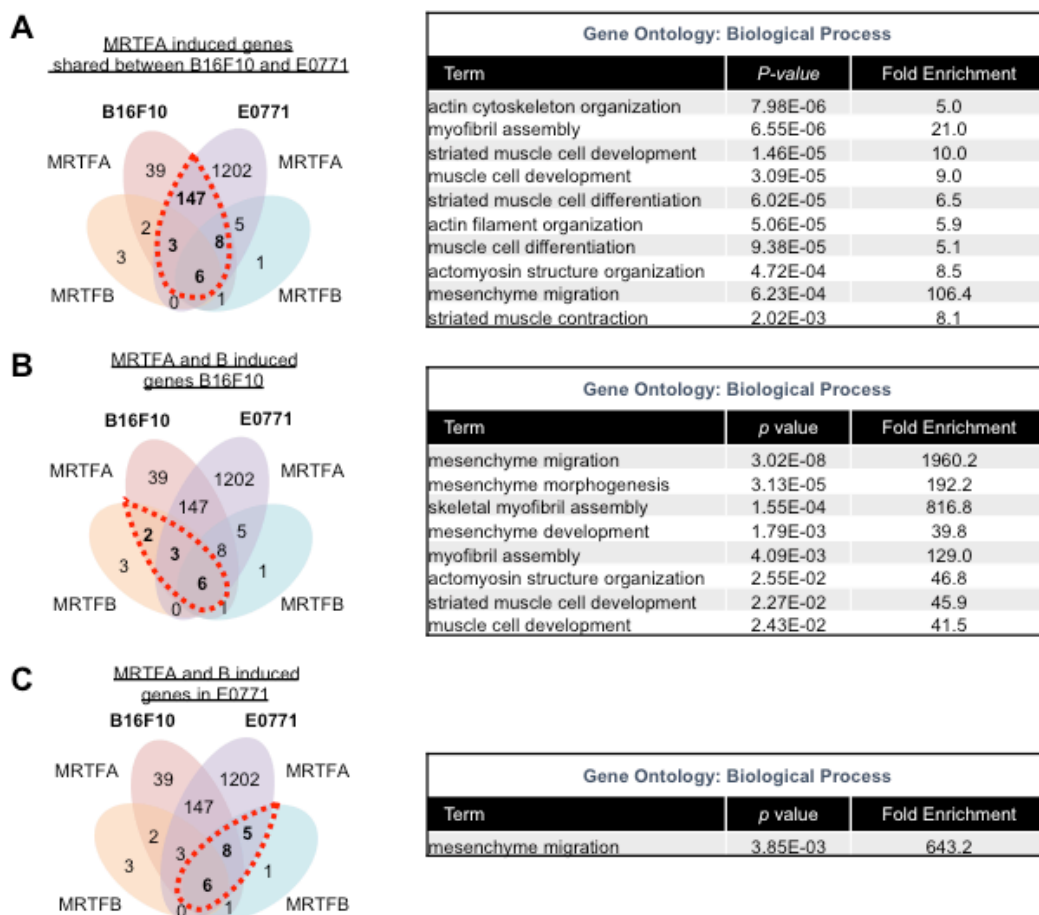

845  
 846 **Fig. S5. RNA sequencing analysis of MRTFA and MRTFB expressing cells.**  
 847 Related to Fig. 5. (A-C) Left, Venn diagrams of upregulated genes exclusive to or shared by  
 848 B16F10 and E0771 cells, with bold numbers and red dashed circles highlighting gene sets used  
 849 for the GO analyses on the right. Up to 10 statistically significant GO terms are shown in each  
 850 table, with reported  $p$  values corrected for multiple testing using the Benjamini method.

851  
 852  
 853  
 854  
 855  
 856  
 857



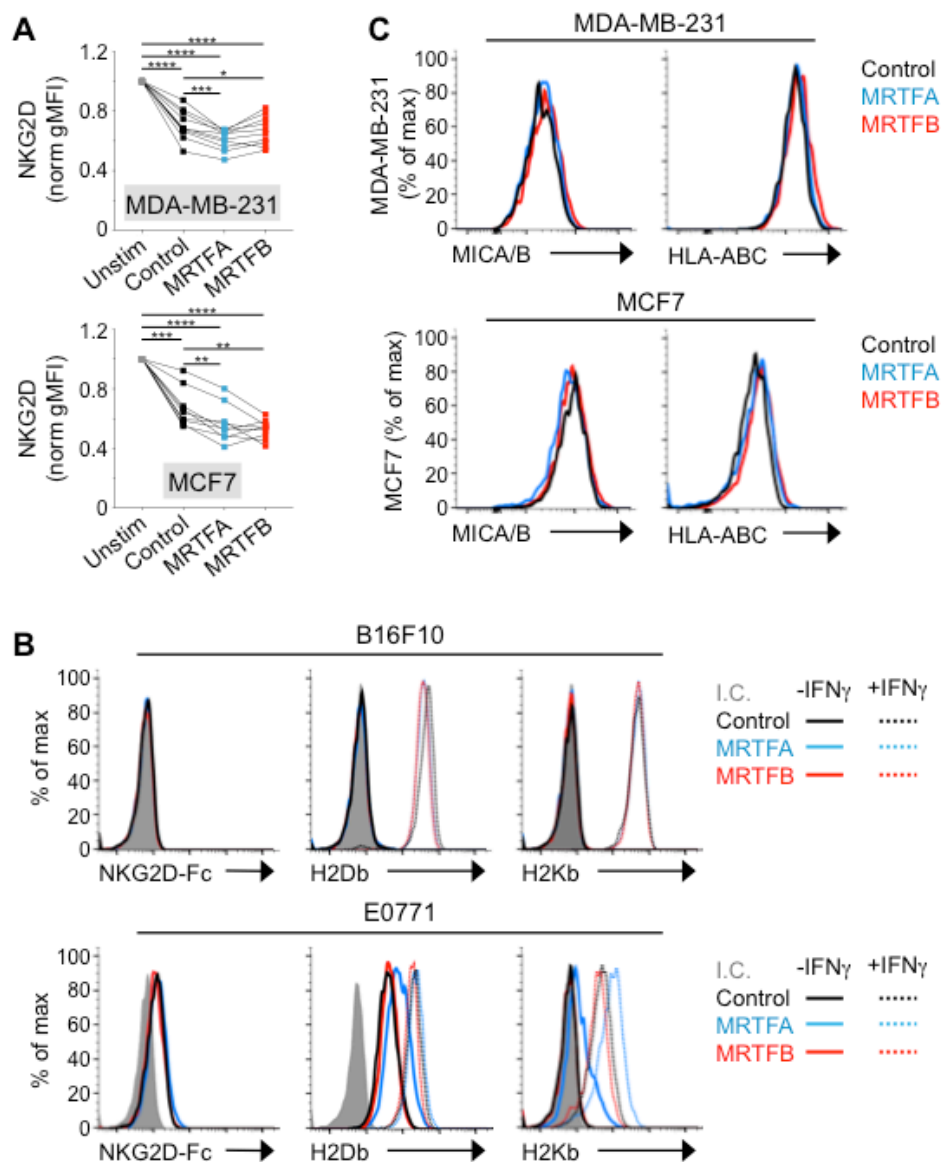

858  
 859 **Fig. S6. Surface protein expression on cells overexpressing MRTFA or MRTFB.**  
 860 Related to Fig. 6. (A) Flow cytometric analysis of NKG2D expression on human NK cells after 5  
 861 h coculture with the indicated target cells. Data were normalized against NKG2D levels on  
 862 untreated NK cells. Gray lines denote samples derived from the same donor. \*\*\*\* $p < 0.0001$ ,  
 863 \*\*\* $p < 0.001$ , \*\* $p < 0.01$ , and \* $p < 0.05$  calculated by one-way ANOVA ( $n = 9$  donors for MCF7  
 864 experiments,  $n = 10$  donors for MDA-MB-231 experiments). Data pooled from 3 independent  
 865 experiments. (B) Flow cytometric analysis of NKG2D ligands and MHC proteins (H2Db and  
 866 H2Kb) on the indicated control or MRTFA/B overexpressing B16F10 and E0771 cell lines. Cells  
 867 were untreated (solid lines) or pretreated overnight with IFN $\gamma$  (dotted lines). Isotype control (I.C.)  
 868 is shown in gray. Histograms are representative of 3 independent experiments. (C) Flow

869 cytometric analysis of MICA/B (NKG2D ligands) and HLA-ABC (MHC) on the indicated control  
870 and MRTFA/B overexpressing MDA-MB-231 and MCF7 cell lines. Histograms are  
871 representative of 3 independent experiments.

872

873

874

875

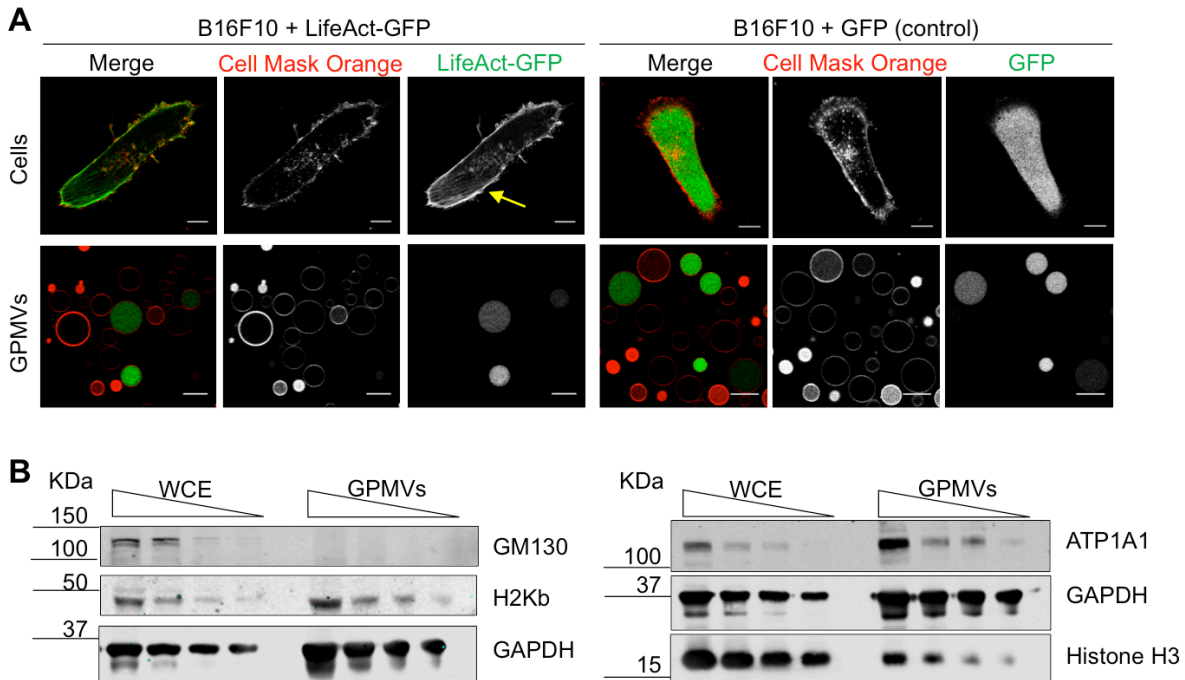

876

877 **Fig. S7. Characterization of giant plasma membrane vesicles (GPMVs).**

878 Related to Fig. 7. (A) Representative confocal images of whole cells (above) and cell-derived  
879 GPMVs (below). B16F10 cells overexpressing LifeAct-GFP (green, left panel) or GFP control  
880 (green, right panel) were labeled with the plasma membrane dye Cell Mask Orange (red).  
881 Yellow arrow indicates cortical F-actin present in cells but not in GPMVs. Scale bars: 10  $\mu$ m. (B)  
882 Immunoblots of the indicated proteins, performed using serial dilutions of whole cell extracts  
883 (WCE) or GPMVs derived from B16F10 cells. GAPDH served as a loading control. Data are  
884 representative of 3 independent experiments.

885 **ACKNOWLEDGEMENTS**

886 We thank C. Firl, L. Stafford, and X. Zheng for technical support; the MSKCC Molecular  
887 cytology Core Facility for assistance with imaging and AFM; E. Chan for assistance with image  
888 analysis; the MSKCC Integrated Genomics Operation (IGO) and Bioinformatics Core for RNA  
889 sequencing and analysis; UIC Research Informatics Core and Z.A. Lei for assistance with  
890 TCGA GSEA analysis; K. Pham and A. Rudensky for critical reading of the manuscript; N. Biais,  
891 F. Paumet, D. Yuan, L. C. Kam, and members of the M. H., J. M., K. C. H., and J. C. Sun labs  
892 for advice and assistance with experiments. Supported by the NIH (R01-AI087644 to M. H.,  
893 P01-CA94060 to J. M., R01-AI125651 to K. C. H., and P30-CA008748 to MSKCC), the NSF  
894 (CMMI-1562905 to M. H.), the Parker Institute for Cancer Immunotherapy (M. H.), NCATS  
895 (UL1TR002003 to UIC, RIC), Cycle for Survival (IGO), the Kravis Center for Molecular Oncology  
896 (IGO), the Leukemia and Lymphoma Society (M. H.), the Ramón Areces Foundation (M. T.-L.),  
897 and UIC (Department of Physiology and Biophysics Funds to E. E. E.).

898

899 **AUTHOR CONTRIBUTIONS**

900 M. T.-L., E. E. E., K. S. and M. H. conceived and designed experiments. M. T.-L., E. E. E., K. S.,  
901 and J. H. collected and analyzed data. Y. R. and A. C. provided critical technical assistance with  
902 AFM experiments. M. H., J. M., and K. C. H. supervised research and provided grant support. E.  
903 E. E., M. H., M. T.-L., K. S. and J. M. wrote the manuscript.

904

905 **DECLARATION OF INTERESTS**

906 None declared.

907

908

909

910

## 911 REFERENCES

- 912
- 913 Albrengues, J., Shields, M.A., Ng, D., Park, C.G., Ambrico, A., Poindexter, M.E., Upadhyay, P.,  
914 Uyeminami, D.L., Pommier, A., Kuttner, V., *et al.* (2018). Neutrophil extracellular traps produced  
915 during inflammation awaken dormant cancer cells in mice. *Science* *361*.
- 916 Alderton, G.K. (2013). Metastasis: Epithelial to mesenchymal and back again. *Nat Rev Cancer*  
917 *13*, 3.
- 918 Balla, T. (2013). Phosphoinositides: tiny lipids with giant impact on cell regulation. *Physiol Rev*  
919 *93*, 1019-1137.
- 920 Bashour, K.T., Gondarenko, A., Chen, H., Shen, K., Liu, X., Huse, M., Hone, J.C., and Kam,  
921 L.C. (2014). CD28 and CD3 have complementary roles in T-cell traction forces. *Proc Natl Acad*  
922 *Sci U S A* *111*, 2241-2246.
- 923 Basu, R., Whitlock, B.M., Husson, J., Le Floc'h, A., Jin, W., Oyler-Yaniv, A., Dotiwala, F.,  
924 Giannone, G., Hivroz, C., Biais, N., *et al.* (2016). Cytotoxic T Cells Use Mechanical Force to  
925 Potentiate Target Cell Killing. *Cell* *165*, 100-110.
- 926 Behan, F.M., Iorio, F., Picco, G., Goncalves, E., Beaver, C.M., Migliardi, G., Santos, R., Rao, Y.,  
927 Sassi, F., Pinnelli, M., *et al.* (2019). Prioritization of cancer therapeutic targets using CRISPR-  
928 Cas9 screens. *Nature* *568*, 511-516.
- 929 Bhavsar, A.P., Guttman, J.A., and Finlay, B.B. (2007). Manipulation of host-cell pathways by  
930 bacterial pathogens. *Nature* *449*, 827-834.
- 931 Blumenthal, D., Chandra, V., and Burkhardt, J.K. (2019). Mouse T-cell priming is enhanced by  
932 maturation-dependent stiffening of the dendritic cell cortex. *bioRxiv* doi:10.1101/680132.
- 933 Bos, P.D., Zhang, X.H., Nadal, C., Shu, W., Gomis, R.R., Nguyen, D.X., Minn, A.J., van de  
934 Vijver, M.J., Gerald, W.L., Foekens, J.A., *et al.* (2009). Genes that mediate breast cancer  
935 metastasis to the brain. *Nature* *459*, 1005-1009.
- 936 Bravo-Cordero, J.J., Hodgson, L., and Condeelis, J. (2012). Directed cell invasion and migration  
937 during metastasis. *Curr Opin Cell Biol* *24*, 277-283.
- 938 Bryant, H.E., Schultz, N., Thomas, H.D., Parker, K.M., Flower, D., Lopez, E., Kyle, S., Meuth,  
939 M., Curtin, N.J., and Helleday, T. (2005). Specific killing of BRCA2-deficient tumours with  
940 inhibitors of poly(ADP-ribose) polymerase. *Nature* *434*, 913-917.
- 941 Cancer Genome Atlas, N. (2015). Genomic Classification of Cutaneous Melanoma. *Cell* *161*,  
942 1681-1696.
- 943 Catalanotti, F., Cheng, D.T., Shoushtari, A.N., Johnson, D.B., Panageas, K.S., Momtaz, P.,  
944 Higham, C., Won, H.H., Harding, J.J., Merghoub, T., *et al.* (2017). PTEN Loss-of-Function  
945 Alterations Are Associated With Intrinsic Resistance to BRAF Inhibitors in Metastatic Melanoma.  
946 *Jco Precis Oncol* *1*.
- 947 Cerami, E., Gao, J., Dogrusoz, U., Gross, B.E., Sumer, S.O., Aksoy, B.A., Jacobsen, A., Byrne,  
948 C.J., Heuer, M.L., Larsson, E., *et al.* (2012). The cBio cancer genomics portal: an open platform  
949 for exploring multidimensional cancer genomics data. *Cancer Discov* *2*, 401-404.
- 950 Clucas, J., and Valderrama, F. (2014). ERM proteins in cancer progression. *J Cell Sci* *127*, 267-  
951 275.
- 952 Comrie, W.A., Li, S., Boyle, S., and Burkhardt, J.K. (2015). The dendritic cell cytoskeleton  
953 promotes T cell adhesion and activation by constraining ICAM-1 mobility. *The Journal of cell*  
954 *biology* *208*, 457-473.
- 955 David, C.J., Huang, Y.H., Chen, M., Su, J., Zou, Y., Bardeesy, N., Iacobuzio-Donahue, C.A.,  
956 and Massague, J. (2016). TGF-beta Tumor Suppression through a Lethal EMT. *Cell* *164*, 1015-  
957 1030.
- 958 DeBerardinis, R.J., and Chandel, N.S. (2016). Fundamentals of cancer metabolism. *Sci Adv* *2*,  
959 e1600200.
- 960 del Rio, A., Perez-Jimenez, R., Liu, R., Roca-Cusachs, P., Fernandez, J.M., and Sheetz, M.P.  
961 (2009). Stretching single talin rod molecules activates vinculin binding. *Science* *323*, 638-641.

- 962 Dobin, A., Davis, C.A., Schlesinger, F., Drenkow, J., Zaleski, C., Jha, S., Batut, P., Chaisson,  
963 M., and Gingeras, T.R. (2013). STAR: ultrafast universal RNA-seq aligner. *Bioinformatics* 29,  
964 15-21.
- 965 Dustin, M.L., and Long, E.O. (2010). Cytotoxic immunological synapses. *Immunol Rev* 235, 24-  
966 34.
- 967 Dye, S.E. (1986). The antimetastatic function of concomitant antitumor immunity. I. Host Ly-  
968 1+2+ effector T cells prevent the enumeration of metastatic tumor cells in a biological assay. *J*  
969 *Immunol* 136, 1504-1509.
- 970 Ellrott, K., Bailey, M.H., Saksena, G., Covington, K.R., Kandath, C., Stewart, C., Hess, J., Ma,  
971 S., Chiotti, K.E., McLellan, M., *et al.* (2018). Scalable Open Science Approach for Mutation  
972 Calling of Tumor Exomes Using Multiple Genomic Pipelines. *Cell Syst* 6, 271-281 e277.
- 973 Engstrom, P.G., Steijger, T., Sipos, B., Grant, G.R., Kahles, A., Ratsch, G., Goldman, N.,  
974 Hubbard, T.J., Harrow, J., Guigo, R., *et al.* (2013). Systematic evaluation of spliced alignment  
975 programs for RNA-seq data. *Nat Methods* 10, 1185-1191.
- 976 Er, E.E., Valiente, M., Ganesh, K., Zou, Y., Agrawal, S., Hu, J., Griscom, B., Rosenblum, M.,  
977 Boire, A., Brogi, E., *et al.* (2018). Pericyte-like spreading by disseminated cancer cells activates  
978 YAP and MRTF for metastatic colonization. *Nat Cell Biol* 20, 966-978.
- 979 Eyles, J., Puaux, A.L., Wang, X., Toh, B., Prakash, C., Hong, M., Tan, T.G., Zheng, L., Ong,  
980 L.C., Jin, Y., *et al.* (2010). Tumor cells disseminate early, but immunosurveillance limits  
981 metastatic outgrowth, in a mouse model of melanoma. *J Clin Invest* 120, 2030-2039.
- 982 Farmer, H., McCabe, N., Lord, C.J., Tutt, A.N., Johnson, D.A., Richardson, T.B., Santarosa, M.,  
983 Dillon, K.J., Hickson, I., Knights, C., *et al.* (2005). Targeting the DNA repair defect in BRCA  
984 mutant cells as a therapeutic strategy. *Nature* 434, 917-921.
- 985 Finn, O.J. (2018). A Believer's Overview of Cancer Immunosurveillance and Immunotherapy. *J*  
986 *Immunol* 200, 385-391.
- 987 Friedland, J.C., Lee, M.H., and Boettiger, D. (2009). Mechanically activated integrin switch  
988 controls alpha5beta1 function. *Science* 323, 642-644.
- 989 Gao, J., Aksoy, B.A., Dogrusoz, U., Dresdner, G., Gross, B., Sumer, S.O., Sun, Y., Jacobsen,  
990 A., Sinha, R., Larsson, E., *et al.* (2013). Integrative analysis of complex cancer genomics and  
991 clinical profiles using the cBioPortal. *Sci Signal* 6, pl1.
- 992 Gao, Q., Liang, W.W., Foltz, S.M., Mutharasu, G., Jayasinghe, R.G., Cao, S., Liao, W.W.,  
993 Reynolds, S.M., Wyczalkowski, M.A., Yao, L., *et al.* (2018). Driver Fusions and Their  
994 Implications in the Development and Treatment of Human Cancers. *Cell Rep* 23, 227-238 e223.
- 995 Gau, D., and Roy, P. (2018). SRF'ing and SAP'ing - the role of MRTF proteins in cell migration.  
996 *J Cell Sci* 131.
- 997 Gauthier, N.C., Masters, T.A., and Sheetz, M.P. (2012). Mechanical feedback between  
998 membrane tension and dynamics. *Trends Cell Biol* 22, 527-535.
- 999 Ghajar, C.M., Peinado, H., Mori, H., Matei, I.R., Evason, K.J., Brazier, H., Almeida, D., Koller,  
1000 A., Hajjar, K.A., Stainier, D.Y., *et al.* (2013). The perivascular niche regulates breast tumour  
1001 dormancy. *Nat Cell Biol* 15, 807-817.
- 1002 Gonzalez, C., Chames, P., Kerfelec, B., Baty, D., Robert, P., and Limozin, L. (2019). Nanobody-  
1003 CD16 Catch Bond Reveals NK Cell Mechanosensitivity. *Biophys J* 116, 1516-1526.
- 1004 Gualdrini, F., Esnault, C., Horswell, S., Stewart, A., Matthews, N., and Treisman, R. (2016).  
1005 SRF Co-factors Control the Balance between Cell Proliferation and Contractility. *Mol Cell* 64,  
1006 1048-1061.
- 1007 Guck, J., Schinkinger, S., Lincoln, B., Wottawah, F., Ebert, S., Romeyke, M., Lenz, D., Erickson,  
1008 H.M., Ananthakrishnan, R., Mitchell, D., *et al.* (2005). Optical deformability as an inherent cell  
1009 marker for testing malignant transformation and metastatic competence. *Biophys J* 88, 3689-  
1010 3698.
- 1011 Hall, A. (2009). The cytoskeleton and cancer. *Cancer Metastasis Rev* 28, 5-14.

- 1012 Hernandez, C., Huebener, P., and Schwabe, R.F. (2016). Damage-associated molecular  
1013 patterns in cancer: a double-edged sword. *Oncogene* 35, 5931-5941.
- 1014 Hoadley, K.A., Yau, C., Hinoue, T., Wolf, D.M., Lazar, A.J., Drill, E., Shen, R., Taylor, A.M.,  
1015 Cherniack, A.D., Thorsson, V., *et al.* (2018). Cell-of-Origin Patterns Dominate the Molecular  
1016 Classification of 10,000 Tumors from 33 Types of Cancer. *Cell* 173, 291-304 e296.
- 1017 Hou, H.W., Li, Q.S., Lee, G.Y., Kumar, A.P., Ong, C.N., and Lim, C.T. (2009). Deformability  
1018 study of breast cancer cells using microfluidics. *Biomedical microdevices* 11, 557-564.
- 1019 Huang da, W., Sherman, B.T., and Lempicki, R.A. (2009). Systematic and integrative analysis of  
1020 large gene lists using DAVID bioinformatics resources. *Nat Protoc* 4, 44-57.
- 1021 Huse, M. (2017). Mechanical forces in the immune system. *Nat Rev Immunol* 17, 679-690.
- 1022 Husson, J., Chemin, K., Bohineust, A., Hivroz, C., and Henry, N. (2011). Force generation upon  
1023 T cell receptor engagement. *PloS one* 6, e19680.
- 1024 Jacobson, K., Liu, P., and Lagerholm, B.C. (2019). The Lateral Organization and Mobility of  
1025 Plasma Membrane Components. *Cell* 177, 806-819.
- 1026 Judokusumo, E., Tabdanov, E., Kumari, S., Dustin, M.L., and Kam, L.C. (2012).  
1027 Mechanosensing in T lymphocyte activation. *Biophys J* 102, L5-7.
- 1028 Kai, F., Drain, A.P., and Weaver, V.M. (2019). The Extracellular Matrix Modulates the Metastatic  
1029 Journey. *Dev Cell* 49, 332-346.
- 1030 Kasza, K.E., Nakamura, F., Hu, S., Kollmannsberger, P., Bonakdar, N., Fabry, B., Stossel, T.P.,  
1031 Wang, N., and Weitz, D.A. (2009). Filamin A is essential for active cell stiffening but not passive  
1032 stiffening under external force. *Biophys J* 96, 4326-4335.
- 1033 Kienast, Y., von Baumgarten, L., Fuhrmann, M., Klinkert, W.E., Goldbrunner, R., Herms, J., and  
1034 Winkler, F. (2010). Real-time imaging reveals the single steps of brain metastasis formation. *Nat*  
1035 *Med* 16, 116-122.
- 1036 Kim, T., Hwang, D., Lee, D., Kim, J.H., Kim, S.Y., and Lim, D.S. (2017). MRTF potentiates  
1037 TEAD-YAP transcriptional activity causing metastasis. *EMBO J* 36, 520-535.
- 1038 Kong, F., Garcia, A.J., Mould, A.P., Humphries, M.J., and Zhu, C. (2009). Demonstration of  
1039 catch bonds between an integrin and its ligand. *The Journal of cell biology* 185, 1275-1284.
- 1040 Kong, X., Kuilman, T., Shahrabadi, A., Boshuizen, J., Kemper, K., Song, J.Y., Niessen, H.W.M.,  
1041 Rozeman, E.A., Geukes Foppen, M.H., Blank, C.U., *et al.* (2017). Cancer drug addiction is  
1042 relayed by an ERK2-dependent phenotype switch. *Nature* 550, 270-274.
- 1043 Lanier, L.L. (2005). NK cell recognition. *Annu Rev Immunol* 23, 225-274.
- 1044 Lawson, D.A., Bhakta, N.R., Kessenbrock, K., Prummel, K.D., Yu, Y., Takai, K., Zhou, A., Eyob,  
1045 H., Balakrishnan, S., Wang, C.Y., *et al.* (2015). Single-cell analysis reveals a stem-cell program  
1046 in human metastatic breast cancer cells. *Nature* 526, 131-135.
- 1047 Le Floc'h, A., Tanaka, Y., Bantilan, N.S., Voisinne, G., Altan-Bonnet, G., Fukui, Y., and Huse, M.  
1048 (2013). Annular PIP3 accumulation controls actin architecture and modulates cytotoxicity at the  
1049 immunological synapse. *J Exp Med* 210, 2721-2737.
- 1050 Lee, M.S., Glassman, C.R., Deshpande, N.R., Badgandi, H.B., Parrish, H.L., Uttamapinant, C.,  
1051 Stawski, P.S., Ting, A.Y., and Kuhns, M.S. (2015). A Mechanical Switch Couples T Cell  
1052 Receptor Triggering to the Cytoplasmic Juxtamembrane Regions of CD3zeta. *Immunity* 43,  
1053 227-239.
- 1054 Lesokhin, A.M., Callahan, M.K., Postow, M.A., and Wolchok, J.D. (2015). On being less  
1055 tolerant: enhanced cancer immunosurveillance enabled by targeting checkpoints and agonists  
1056 of T cell activation. *Science translational medicine* 7, 280sr281.
- 1057 Levental, K.R., Yu, H., Kass, L., Lakins, J.N., Egeblad, M., Erler, J.T., Fong, S.F., Csiszar, K.,  
1058 Giaccia, A., Wenginger, W., *et al.* (2009). Matrix crosslinking forces tumor progression by  
1059 enhancing integrin signaling. *Cell* 139, 891-906.
- 1060 Liang, W.S., Hendricks, W., Kiefer, J., Schmidt, J., Sekar, S., Carpten, J., Craig, D.W., Adkins,  
1061 J., Cuyugan, L., Manojlovic, Z., *et al.* (2017). Integrated genomic analyses reveal frequent TERT  
1062 aberrations in acral melanoma. *Genome Res* 27, 524-532.

- 1063 Lionarons, D.A., Hancock, D.C., Rana, S., East, P., Moore, C., Murillo, M.M., Carvalho, J.,  
1064 Spencer-Dene, B., Herbert, E., Stamp, G., *et al.* (2019). RAC1(P29S) Induces a Mesenchymal  
1065 Phenotypic Switch via Serum Response Factor to Promote Melanoma Development and  
1066 Therapy Resistance. *Cancer Cell* 36, 68-83 e69.
- 1067 Liu, B., Chen, W., Evavold, B.D., and Zhu, C. (2014). Accumulation of dynamic catch bonds  
1068 between TCR and agonist peptide-MHC triggers T cell signaling. *Cell* 157, 357-368.
- 1069 Liu, J., Lichtenberg, T., Hoadley, K.A., Poisson, L.M., Lazar, A.J., Cherniack, A.D., Kovatich,  
1070 A.J., Benz, C.C., Levine, D.A., Lee, A.V., *et al.* (2018). An Integrated TCGA Pan-Cancer Clinical  
1071 Data Resource to Drive High-Quality Survival Outcome Analytics. *Cell* 173, 400-416 e411.
- 1072 Maldarelli, F., Wu, X., Su, L., Simonetti, F.R., Shao, W., Hill, S., Spindler, J., Ferris, A.L.,  
1073 Mellors, J.W., Kearney, M.F., *et al.* (2014). HIV latency. Specific HIV integration sites are linked  
1074 to clonal expansion and persistence of infected cells. *Science* 345, 179-183.
- 1075 Malladi, S., Macalinao, D.G., Jin, X., He, L., Basnet, H., Zou, Y., de Stanchina, E., and  
1076 Massague, J. (2016). Metastatic Latency and Immune Evasion through Autocrine Inhibition of  
1077 WNT. *Cell* 165, 45-60.
- 1078 Medjkane, S., Perez-Sanchez, C., Gaggioli, C., Sahai, E., and Treisman, R. (2009). Myocardin-  
1079 related transcription factors and SRF are required for cytoskeletal dynamics and experimental  
1080 metastasis. *Nat Cell Biol* 11, 257-268.
- 1081 Metais, A., Lamsoul, I., Melet, A., Uttenweiler-Joseph, S., Poincloux, R., Stefanovic, S., Valiere,  
1082 A., Gonzalez de Peredo, A., Stella, A., Burlet-Schiltz, O., *et al.* (2018). Asb2alpha-Filamin A  
1083 Axis Is Essential for Actin Cytoskeleton Remodeling During Heart Development. *Circ Res* 122,  
1084 e34-e48.
- 1085 Miao, D., Margolis, C.A., Vokes, N.I., Liu, D., Taylor-Weiner, A., Wankowicz, S.M., Adeegbe, D.,  
1086 Keliher, D., Schilling, B., Tracy, A., *et al.* (2018). Genomic correlates of response to immune  
1087 checkpoint blockade in microsatellite-stable solid tumors. *Nat Genet* 50, 1271-1281.
- 1088 Nagata, S. (1999). Fas ligand-induced apoptosis. *Annu Rev Genet* 33, 29-55.
- 1089 Northcott, J.M., Dean, I.S., Mouw, J.K., and Weaver, V.M. (2018). Feeling Stress: The  
1090 Mechanics of Cancer Progression and Aggression. *Front Cell Dev Biol* 6, 17.
- 1091 Ocana, O.H., Corcoles, R., Fabra, A., Moreno-Bueno, G., Acloque, H., Vega, S., Barrallo-  
1092 Gimeno, A., Cano, A., and Nieto, M.A. (2012). Metastatic colonization requires the repression of  
1093 the epithelial-mesenchymal transition inducer Prrx1. *Cancer Cell* 22, 709-724.
- 1094 Olson, E.N., and Nordheim, A. (2010). Linking actin dynamics and gene transcription to drive  
1095 cellular motile functions. *Nat Rev Mol Cell Biol* 11, 353-365.
- 1096 Panciera, T., Citron, A., Di Biagio, D., Battilana, G., Gandin, A., Giullitti, S., Forcato, M., Biciato,  
1097 S., Panzetta, V., Fusco, S., *et al.* (2020). Reprogramming normal cells into tumour precursors  
1098 requires ECM stiffness and oncogene-mediated changes of cell mechanical properties. *Nat*  
1099 *Mater*.
- 1100 Parker, A.L., Kavallaris, M., and McCarroll, J.A. (2014). Microtubules and their role in cellular  
1101 stress in cancer. *Front Oncol* 4, 153.
- 1102 Pommier, A., Anaparthi, N., Memos, N., Kelley, Z.L., Gouronnec, A., Yan, R., Auffray, C.,  
1103 Albregues, J., Egeblad, M., Iacobuzio-Donahue, C.A., *et al.* (2018). Unresolved endoplasmic  
1104 reticulum stress engenders immune-resistant, latent pancreatic cancer metastases. *Science*  
1105 360.
- 1106 Ponomarev, V., Doubrovin, M., Serganova, I., Vider, J., Shavrin, A., Beresten, T., Ivanova, A.,  
1107 Ageyeva, L., Tourkova, V., Balatoni, J., *et al.* (2004). A novel triple-modality reporter gene for  
1108 whole-body fluorescent, bioluminescent, and nuclear noninvasive imaging. *Eur J Nucl Med Mol*  
1109 *Imaging* 31, 740-751.
- 1110 Puram, S.V., Parikh, A.S., and Tirosh, I. (2018). Single cell RNA-seq highlights a role for a  
1111 partial EMT in head and neck cancer. *Mol Cell Oncol* 5, e1448244.
- 1112 Rotsch, C., and Radmacher, M. (2000). Drug-induced changes of cytoskeletal structure and  
1113 mechanics in fibroblasts: an atomic force microscopy study. *Biophys J* 78, 520-535.

- 1114 Saitakis, M., Dogniaux, S., Goudot, C., Bufi, N., Asnacios, S., Maurin, M., Randriamampita, C.,  
1115 Asnacios, A., and Hivroz, C. (2017). Different TCR-induced T lymphocyte responses are  
1116 potentiated by stiffness with variable sensitivity. *Elife* 6.
- 1117 Samstein, R.M., Lee, C.H., Shoushtari, A.N., Hellmann, M.D., Shen, R., Janjigian, Y.Y., Barron,  
1118 D.A., Zehir, A., Jordan, E.J., Omuro, A., *et al.* (2019). Tumor mutational load predicts survival  
1119 after immunotherapy across multiple cancer types. *Nat Genet* 51, 202-206.
- 1120 Sanchez-Vega, F., Mina, M., Armenia, J., Chatila, W.K., Luna, A., La, K.C., Dimitriadoy, S., Liu,  
1121 D.L., Kantheti, H.S., Saghafeina, S., *et al.* (2018). Oncogenic Signaling Pathways in The Cancer  
1122 Genome Atlas. *Cell* 173, 321-337 e310.
- 1123 Schneider, F., Waithe, D., Clausen, M.P., Galiani, S., Koller, T., Ozhan, G., Eggeling, C., and  
1124 Sezgin, E. (2017). Diffusion of lipids and GPI-anchored proteins in actin-free plasma membrane  
1125 vesicles measured by STED-FCS. *Mol Biol Cell* 28, 1507-1518.
- 1126 Schumacher, T.N., Scheper, W., and Kvistborg, P. (2019). Cancer Neoantigens. *Annu Rev*  
1127 *Immunol* 37, 173-200.
- 1128 Sezgin, E., Kaiser, H.J., Baumgart, T., Schwille, P., Simons, K., and Levental, I. (2012).  
1129 Elucidating membrane structure and protein behavior using giant plasma membrane vesicles.  
1130 *Nat Protoc* 7, 1042-1051.
- 1131 Shibue, T., and Weinberg, R.A. (2009). Integrin beta1-focal adhesion kinase signaling directs  
1132 the proliferation of metastatic cancer cells disseminated in the lungs. *Proc Natl Acad Sci U S A*  
1133 106, 10290-10295.
- 1134 Stinchcombe, J.C., and Griffiths, G.M. (2007). Secretory mechanisms in cell-mediated  
1135 cytotoxicity. *Annu Rev Cell Dev Biol* 23, 495-517.
- 1136 Suresh, S. (2007). Biomechanics and biophysics of cancer cells. *Acta Biomater* 3, 413-438.
- 1137 Taylor, A.M., Shih, J., Ha, G., Gao, G.F., Zhang, X., Berger, A.C., Schumacher, S.E., Wang, C.,  
1138 Hu, H., Liu, J., *et al.* (2018). Genomic and Functional Approaches to Understanding Cancer  
1139 Aneuploidy. *Cancer Cell* 33, 676-689 e673.
- 1140 Tsai, J.H., Donaher, J.L., Murphy, D.A., Chau, S., and Yang, J. (2012). Spatiotemporal  
1141 regulation of epithelial-mesenchymal transition is essential for squamous cell carcinoma  
1142 metastasis. *Cancer Cell* 22, 725-736.
- 1143 Usmani, S.M., Murooka, T.T., Deruaz, M., Koh, W.H., Sharaf, R.R., Di Pilato, M., Power, K.A.,  
1144 Lopez, P., Hnatiuk, R., Vrbanac, V.D., *et al.* (2019). HIV-1 Balances the Fitness Costs and  
1145 Benefits of Disrupting the Host Cell Actin Cytoskeleton Early after Mucosal Transmission. *Cell*  
1146 *Host Microbe* 25, 73-86 e75.
- 1147 Valiente, M., Obenauf, A.C., Jin, X., Chen, Q., Zhang, X.H., Lee, D.J., Chaff, J.E., Kris, M.G.,  
1148 Huse, J.T., Brogi, E., *et al.* (2014). Serpins promote cancer cell survival and vascular co-option  
1149 in brain metastasis. *Cell* 156, 1002-1016.
- 1150 Van Allen, E.M., Wagle, N., Sucker, A., Treacy, D.J., Johannessen, C.M., Goetz, E.M., Place,  
1151 C.S., Taylor-Weiner, A., Whittaker, S., Kryukov, G.V., *et al.* (2014). The genetic landscape of  
1152 clinical resistance to RAF inhibition in metastatic melanoma. *Cancer Discov* 4, 94-109.
- 1153 Vesely, M.D., Kershaw, M.H., Schreiber, R.D., and Smyth, M.J. (2011). Natural innate and  
1154 adaptive immunity to cancer. *Annu Rev Immunol* 29, 235-271.
- 1155 Wan, Z., Zhang, S., Fan, Y., Liu, K., Du, F., Davey, A.M., Zhang, H., Han, W., Xiong, C., and  
1156 Liu, W. (2013). B cell activation is regulated by the stiffness properties of the substrate  
1157 presenting the antigens. *J Immunol* 190, 4661-4675.
- 1158 Watson, I.R., Li, L., Cabeceiras, P.K., Mahdavi, M., Gutschner, T., Genovese, G., Wang, G.,  
1159 Fang, Z., Tepper, J.M., Stemke-Hale, K., *et al.* (2014). The RAC1 P29S hotspot mutation in  
1160 melanoma confers resistance to pharmacological inhibition of RAF. *Cancer Res* 74, 4845-4852.
- 1161 Wei, S.C., Duffy, C.R., and Allison, J.P. (2018). Fundamental Mechanisms of Immune  
1162 Checkpoint Blockade Therapy. *Cancer Discov* 8, 1069-1086.
- 1163 Weinstein, I.B. (2002). Cancer. Addiction to oncogenes--the Achilles heal of cancer. *Science*  
1164 297, 63-64.



- 1165 Wesolowski, J., and Paumet, F. (2017). Taking control: reorganization of the host cytoskeleton  
1166 by Chlamydia. *F1000Res* 6, 2058.
- 1167 Xu, W., Mezencev, R., Kim, B., Wang, L., McDonald, J., and Sulchek, T. (2012). Cell stiffness is  
1168 a biomarker of the metastatic potential of ovarian cancer cells. *PLoS one* 7, e46609.
- 1169 Zhang, N., and Bevan, M.J. (2011). CD8(+) T cells: foot soldiers of the immune system.  
1170 *Immunity* 35, 161-168.
- 1171 Zhang, Y., and Weinberg, R.A. (2018). Epithelial-to-mesenchymal transition in cancer:  
1172 complexity and opportunities. *Front Med* 12, 361-373.
- 1173 Zhu, C., Chen, W., Lou, J., Rittase, W., and Li, K. (2019). Mechanosensing through  
1174 immunoreceptors. *Nat Immunol* 20, 1269-1278.
- 1175
- 1176
